# Supplementary material for: Acoustic stimulation for relieving pain during venipuncture: a systematic review and network meta-analysis
Source: HighWire-hosted journal article supplement (doi:10.1136/bmjopen-2023-077343), 2023-12-01
Supplement: bmjopen-2023-077343supp001_data_supplement.pdf [file bmjopen-2023-077343supp001_data_supplement.pdf]

## **Acoustic Stimulation for Relieving Pain During Venipuncture: A Systematic Review and Network Meta-analysis**

Yosuke Yamada, Mineaki Kitamura, Emi Inayama, Masatsugu Kishida, Yuki Kataoka and Tatsuyoshi Ikenoue

### **Supplementary materials**

Supplemental Table 1. Search strategy for PubMed used in the current study

Supplemental Table 2. Search strategy for EMBASE used in the current study

Supplemental Table 3. Search strategy for CENTRAL used in the current study

Supplemental Table 4. Search strategy for CINAHL used in the current study

Supplemental Table 5. Baseline characteristics of the 27 included studies

Supplemental Table 6. Characteristics, including eligibility criteria, of the 27 studies in this review

Supplemental Table 7. Summary of acoustic stimulations assigned to each classification

Supplemental Table 8. Intervention and outcome details for each study

Supplemental Table 9. Direct and pooled comparisons and rankings for self-reported pain

Supplemental Table 10. Direct and pooled comparisons and rankings for mental distress

Supplemental Table 11. Individual study results in outcome of adverse events (for all studies) grouped by treatment comparison

Supplemental Table 12. Report of confidence in network meta-analysis: self-reported pain

Supplemental Table 13. Global test based on a random-effects design-by-treatment interaction model

Supplemental Table 14. Report of confidence in network meta-analysis: self-reported distress

Supplemental Figure 1. Conceptual diagram of the research questions for this study.

Supplemental Figure 2. Flow chart to classifying the acoustic stimulations into 5 groups

Supplemental Figure 3. Risk of bias for outcome of self-reported pain

Supplemental Figure 4. Risk of bias for outcome of self-reported mental distress

Supplemental Figure 5. Risk of bias for outcome of adverse events

Supplemental Figure 6. Individual study results in outcome of self-reported mental distress (for all studies) grouped by treatment comparison

Supplemental Figure 7. Results of subgroup analysis divided into adults or children

Supplemental Figure 8. Results of subgroup analysis by type of venipuncture technique

Supplemental Figure 9. Sensitivity analysis excluding high risk of bias study

Supplemental Figure 10. Sensitivity analysis excluding studies that did not report the standard deviation of self-reported pain

Supplemental Figure 11. Post-hoc sensitivity analysis excluding studies with small number of subjects

Supplemental Figure 12. Forest plot for self-reported pain (Balan 2009 excluded)

Supplemental Information 1. PRISMA NMA checklist of items to include when reporting a systematic review involving a network meta-analysis

Supplemental Information 2. Analytical treatment of the study by Aydin et al. and basis for the evaluation of confidence

Supplemental Table 1. Search strategy for PubMed used in the current study

| Search number | Query                                                                                                                                                                                                                                                                                                                                                                                                                                                                         |
|---------------|-------------------------------------------------------------------------------------------------------------------------------------------------------------------------------------------------------------------------------------------------------------------------------------------------------------------------------------------------------------------------------------------------------------------------------------------------------------------------------|
| #1            | "Infusions, Intravenous"[mh]                                                                                                                                                                                                                                                                                                                                                                                                                                                  |
| #2            | "Injections, Intravenous"[mh]                                                                                                                                                                                                                                                                                                                                                                                                                                                 |
| #3            | "Catheterization"[mh]                                                                                                                                                                                                                                                                                                                                                                                                                                                         |
| #4            | "Catheterization, Peripheral"[mh]                                                                                                                                                                                                                                                                                                                                                                                                                                             |
| #5            | "Phlebotomy"[mh]                                                                                                                                                                                                                                                                                                                                                                                                                                                              |
| #6            | "cannula*"[tiab] OR "catheter*"[tiab] OR "Phlebotom*"[tiab] OR "Venesection*"[tiab] OR "Venipuncture*"[tiab] OR ("pain*"[tiab] AND ("needl*"[tiab] OR "intravenous"[tiab])) OR ("needl*"[tiab] AND "procedure*"[tiab]) OR (("injection*"[tiab] OR "infusion*"[tiab] OR "punctur*"[tiab]) AND ("intravenous"[tiab] OR "vein*"[tiab] OR "Drip"[tiab] OR "blood vessel*"[tiab] OR "vascular"[tiab] OR "Arteriovenous Fistula*"[tiab])) OR ("intravenous"[tiab] AND "Drip"[tiab]) |
| #7            | #1 OR #2 OR #3 OR #4 OR #5 OR #6                                                                                                                                                                                                                                                                                                                                                                                                                                              |
| #8            | "Acoustic Stimulation"[mh]                                                                                                                                                                                                                                                                                                                                                                                                                                                    |
| #9            | "Music"[mh]                                                                                                                                                                                                                                                                                                                                                                                                                                                                   |
| #10           | "Music therapy"[mh]                                                                                                                                                                                                                                                                                                                                                                                                                                                           |
| #11           | "Sound"[mh]                                                                                                                                                                                                                                                                                                                                                                                                                                                                   |
| #12           | "Noise"[mh]                                                                                                                                                                                                                                                                                                                                                                                                                                                                   |
| #13           | "Audiometry"[mh]                                                                                                                                                                                                                                                                                                                                                                                                                                                              |
| #14           | "Acoustic"[tiab] OR "Auditory"[tiab] OR "Music*"[tiab] OR "rhythm*"[tiab] OR "melod*"[tiab] OR "singing"[tiab] OR "sing"[tiab] OR "song"[tiab] OR "songs"[tiab] OR "improvis*"[tiab] OR "sonic"[tiab] OR "sound*"[tiab] OR "noise*"[tiab] OR "Audiometr*"[tiab]                                                                                                                                                                                                               |
| #15           | #8 OR #9 OR #10 OR #11 OR #12 OR #13 OR #14                                                                                                                                                                                                                                                                                                                                                                                                                                   |
| #16           | ("Randomized controlled trial"[pt] OR "controlled clinical trial"[pt] OR "Cross-Over Studies"[mh] OR "randomized"[tiab] OR "placebo"[tiab] OR "clinical trials as topic"[mh: noexp] OR "randomly"[tiab] OR "trial"[ti]) NOT ("animals"[mh] NOT "humans"[mh])                                                                                                                                                                                                                  |
| #17           | #7 AND #15 AND #16                                                                                                                                                                                                                                                                                                                                                                                                                                                            |

Search date: Jan 16<sup>th</sup> 2022 (initial search) and Sep 10<sup>th</sup> 2023 (search again)

Search results: 1,577

**Supplemental Table 2. Search strategy for EMBASE used in the current study**

| Set# | Searched for                                                                                                                                                                                                                                                                                               |
|------|------------------------------------------------------------------------------------------------------------------------------------------------------------------------------------------------------------------------------------------------------------------------------------------------------------|
| S1   | EMB.EXACT.EXPLODE("intravenous drug administration")                                                                                                                                                                                                                                                       |
| S2   | EMB.EXACT.EXPLODE("catheterization")                                                                                                                                                                                                                                                                       |
| S3   | EMB.EXACT.EXPLODE("blood vessel catheterization")                                                                                                                                                                                                                                                          |
| S4   | EMB.EXACT.EXPLODE("phlebotomy")                                                                                                                                                                                                                                                                            |
| S5   | ab(cannula* OR catheter* OR Phlebotom* OR Venesection* OR Venipuncture*) OR ti(cannula* OR catheter* OR Phlebotom* OR Venesection* OR Venipuncture*)                                                                                                                                                       |
| S6   | ab(pain* AND (needl* OR intravenous)) OR ti(pain* AND (needl* OR intravenous))                                                                                                                                                                                                                             |
| S7   | ab(needl* AND procedure*) OR ti(needl* AND procedure*)                                                                                                                                                                                                                                                     |
| S8   | ab((injection* OR infusion* OR punctur*) AND (intravenous OR vein* OR Drip OR blood vessel* OR vascular OR Arteriovenous Fistula*)) OR ti((injection* OR infusion* OR punctur*) AND (intravenous OR vein* OR Drip OR blood vessel* OR vascular OR Arteriovenous Fistula*))                                 |
| S9   | ab(intravenous AND Drip) OR ti(intravenous AND Drip)                                                                                                                                                                                                                                                       |
| S10  | S9 OR S8 OR S7 OR S6 OR S5 OR S4 OR S3 OR S2 OR S1                                                                                                                                                                                                                                                         |
| S11  | EMB.EXACT.EXPLODE("auditory stimulation")                                                                                                                                                                                                                                                                  |
| S12  | EMB.EXACT.EXPLODE("music")                                                                                                                                                                                                                                                                                 |
| S13  | EMB.EXACT.EXPLODE("music therapy")                                                                                                                                                                                                                                                                         |
| S14  | EMB.EXACT.EXPLODE("sound")                                                                                                                                                                                                                                                                                 |
| S15  | EMB.EXACT.EXPLODE("noise")                                                                                                                                                                                                                                                                                 |
| S16  | EMB.EXACT.EXPLODE("audiometry")                                                                                                                                                                                                                                                                            |
| S17  | ab(Acoustic OR Auditory OR Music* OR rhythm* OR melod* OR singing OR sing OR song OR songs OR improvis* OR sonic OR sound* OR noise* OR Audiometr*) OR ab(Acoustic OR Auditory OR Music* OR rhythm* OR melod* OR singing OR sing OR song OR songs OR improvis* OR sonic OR sound* OR noise* OR Audiometr*) |
| S18  | S17 OR S16 OR S15 OR S14 OR S13 OR S12 OR S11                                                                                                                                                                                                                                                              |
| S19  | S18 AND S10                                                                                                                                                                                                                                                                                                |
| S20  | ((ab(random*) OR ti(random*)) OR (ab(clinical NEAR/1 trial*) OR ti(clinical NEAR/1 trial*)) OR (EMB.EXACT("health care quality")))                                                                                                                                                                         |

|     |                                                                                                                                                                 |
|-----|-----------------------------------------------------------------------------------------------------------------------------------------------------------------|
| S21 | (EMB.EXACT("double blind procedure")) OR (ab(double NEAR/1 blind*) OR ti(double NEAR/1 blind*)) OR (ab(placebo*) OR ti(placebo*)) OR (ab(blind*) OR ti(blind*)) |
| S22 | S20 AND S19                                                                                                                                                     |
| S23 | S21 AND S19                                                                                                                                                     |

**Search date: Jan 15<sup>th</sup> 2022 (initial search) and Sep 10<sup>th</sup> 2023 (search again)**

**Search results: 2,319**

**Supplemental Table 3. Search strategy for CENTRAL used in the current study**

| ID  | Search                                                                                                                                                                                                                                                                                                                                                      |
|-----|-------------------------------------------------------------------------------------------------------------------------------------------------------------------------------------------------------------------------------------------------------------------------------------------------------------------------------------------------------------|
| #1  | MeSH descriptor: [Infusions, Intravenous] explode all trees                                                                                                                                                                                                                                                                                                 |
| #2  | MeSH descriptor: [Injections, Intravenous] explode all trees                                                                                                                                                                                                                                                                                                |
| #3  | MeSH descriptor: [Catheterization] explode all trees                                                                                                                                                                                                                                                                                                        |
| #4  | MeSH descriptor: [Catheterization, Peripheral] explode all trees                                                                                                                                                                                                                                                                                            |
| #5  | MeSH descriptor: [Phlebotomy] explode all trees                                                                                                                                                                                                                                                                                                             |
| #6  | ((cannula*) OR (catheter*) OR (Phlebotom*) OR (Venesection*) OR (Venipuncture*) OR ((pain*) AND ((needl* OR (intravenous)))) OR ((needl* AND (procedure*)) OR (((injection*) OR (infusion*) OR (punctur*)) AND ((intravenous) OR (vein*) OR (Drip) OR (blood vessel*) OR (vascular) OR (Arteriovenous Fistula*)))) OR ((intravenous) AND (Drip)))):ti,ab,kw |
| #7  | #1 OR #2 OR #3 OR #4 OR #5 OR #6                                                                                                                                                                                                                                                                                                                            |
| #8  | MeSH descriptor: [Acoustic Stimulation] explode all trees                                                                                                                                                                                                                                                                                                   |
| #9  | MeSH descriptor: [Music] explode all trees                                                                                                                                                                                                                                                                                                                  |
| #10 | MeSH descriptor: [Music Therapy] explode all trees                                                                                                                                                                                                                                                                                                          |
| #11 | MeSH descriptor: [Sound] explode all trees                                                                                                                                                                                                                                                                                                                  |
| #12 | MeSH descriptor: [Noise] explode all trees                                                                                                                                                                                                                                                                                                                  |
| #13 | MeSH descriptor: [Audiometry] explode all trees                                                                                                                                                                                                                                                                                                             |
| #14 | ((Acoustic) OR (Auditory) OR (Music*) OR (rhythm*) OR (melod*) OR (singing) OR (sing) OR (song) OR (songs) OR (improvis*) OR (sonic) OR (sound*) OR (noise*) OR (Audiometr*)):ti,ab,kw                                                                                                                                                                      |
| #15 | #8 OR #9 OR #10 OR #11 OR #12 OR #13 OR #14                                                                                                                                                                                                                                                                                                                 |
| #16 | #7 AND #15                                                                                                                                                                                                                                                                                                                                                  |

**Search date: Jan 16<sup>th</sup> 2022 (initial search) and Sep 10<sup>th</sup> 2023 (search again)**

**Search results: 3,186**

**Supplemental Table 4. Search strategy for CINAHL used in the current study**

| Search number | Query                                                                                                                                                                                                                                                                                                                                                                                                                                                                                                                                                                                                                                                                                                                                                                |
|---------------|----------------------------------------------------------------------------------------------------------------------------------------------------------------------------------------------------------------------------------------------------------------------------------------------------------------------------------------------------------------------------------------------------------------------------------------------------------------------------------------------------------------------------------------------------------------------------------------------------------------------------------------------------------------------------------------------------------------------------------------------------------------------|
| S1            | MH infusions, intravenous                                                                                                                                                                                                                                                                                                                                                                                                                                                                                                                                                                                                                                                                                                                                            |
| S2            | MH injections, intravenous                                                                                                                                                                                                                                                                                                                                                                                                                                                                                                                                                                                                                                                                                                                                           |
| S3            | MH catheterization                                                                                                                                                                                                                                                                                                                                                                                                                                                                                                                                                                                                                                                                                                                                                   |
| S4            | MH catheterization, peripheral                                                                                                                                                                                                                                                                                                                                                                                                                                                                                                                                                                                                                                                                                                                                       |
| S5            | MH phlebotomy                                                                                                                                                                                                                                                                                                                                                                                                                                                                                                                                                                                                                                                                                                                                                        |
| S6            | (TI cannula* OR AB cannula*) OR (TI catheter* OR AB catheter*) OR (TI Phlebotom* OR AB Phlebotom*) OR (TI Venesection* OR AB Venesection*) OR (TI Venipuncture* OR AB Venipuncture*) OR ((TI pain* OR AB pain*) AND ((TI needl* OR AB needl*) OR (TI intravenous OR AB intravenous))) OR ((TI needl* OR AB needl*) AND (TI procedure* OR AB procedure*)) OR (((TI injection* OR AB injection*) OR (TI infusion* OR AB infusion*) OR (TI punctur* OR AB punctur*)) AND ((TI intravenous OR AB intravenous) OR (TI vein* OR AB vein*) OR (TI Drip OR AB Drip) OR (TI blood vessel* OR AB blood vessel*) OR (TI vascular OR AB vascular) OR (TI Arteriovenous Fistula* OR AB Arteriovenous Fistula*))) OR ((TI intravenous OR AB intravenous) AND (TI Drip OR AB Drip)) |
| S7            | S1 OR S2 OR S3 OR S4 OR S5 OR S6                                                                                                                                                                                                                                                                                                                                                                                                                                                                                                                                                                                                                                                                                                                                     |
| S8            | MH acoustic stimulation                                                                                                                                                                                                                                                                                                                                                                                                                                                                                                                                                                                                                                                                                                                                              |
| S9            | MH music                                                                                                                                                                                                                                                                                                                                                                                                                                                                                                                                                                                                                                                                                                                                                             |
| S10           | MH music therapy                                                                                                                                                                                                                                                                                                                                                                                                                                                                                                                                                                                                                                                                                                                                                     |
| S11           | MH sound                                                                                                                                                                                                                                                                                                                                                                                                                                                                                                                                                                                                                                                                                                                                                             |
| S12           | MH noise                                                                                                                                                                                                                                                                                                                                                                                                                                                                                                                                                                                                                                                                                                                                                             |
| S13           | MH audiometry                                                                                                                                                                                                                                                                                                                                                                                                                                                                                                                                                                                                                                                                                                                                                        |
| S14           | (TI Acoustic OR AB Acoustic) OR (TI Auditory OR AB Auditory) OR (TI Music* OR AB Music*) OR (TI rhythm* OR AB rhythm*) OR (TI melod* OR AB melod*) OR (TI singing OR AB singing) OR (TI sing OR AB sing) OR (TI song OR AB song) OR (TI songs OR AB songs) OR (TI improvis* OR AB improvis*) OR (TI sonic OR AB sonic) OR (TI sound* OR AB sound*) OR (TI noise* OR AB noise*) OR (TI Audiometr* OR AB Audiometr*)                                                                                                                                                                                                                                                                                                                                                   |
| S15           | S8 OR S9 OR S10 OR S11 OR S12 OR S13 OR S14                                                                                                                                                                                                                                                                                                                                                                                                                                                                                                                                                                                                                                                                                                                          |
| S16           | (MH randomized controlled trials) OR (MH double-blind studies) OR (MH single-blind studies) OR (MH random assignment) OR (MH pretest - posttest design) OR (MH cluster sample) OR (TI (randomised OR randomized)) OR (AB (random*)) OR (TI (trial)) OR (MH (sample size) AND AB (assigned OR allocated OR control)) OR (MH (placebos)) OR (PT (randomized controlled trial)) OR (AB (control W5 group)) OR (MH (crossover design) OR                                                                                                                                                                                                                                                                                                                                 |

|     |                                                                                                                                            |
|-----|--------------------------------------------------------------------------------------------------------------------------------------------|
|     | MH (comparative studies)) OR (AB (cluster W3 RCT)) NOT (((MH animals+) OR (MH (animal studies)) OR (TI (animal model*))) NOT (MH (human))) |
| S17 | S7 AND S15 AND S16                                                                                                                         |

**Search date: 16<sup>th</sup> Jan 2022 (initial search) and Sep 10<sup>th</sup> 2023 (search again)**

**Search results: 1,280**

Supplemental Table 5. Baseline characteristics of the 27 included studies

| Publication    | N randomized | Dropout (%) | Age (y) | Male (%) | Type of RCT | Type of cannulation    | Interventions                                        |                                   |                     |              | Outcomes of interest |
|----------------|--------------|-------------|---------|----------|-------------|------------------------|------------------------------------------------------|-----------------------------------|---------------------|--------------|----------------------|
|                |              |             |         |          |             |                        | Treatment A                                          | Treatment B                       | Treatment C         | Treatment D  |                      |
| Aydin 2017     | 200          | 0           | 9       | 58       | Parallel    | Peripheral             | Music medicine (patient-selected) + distraction card | Music medicine (patient-selected) | Distraction card    | No treatment | Pain                 |
| Tapar 2017     | 153          | 2           | 45.7    | NR       | Parallel    | Peripheral             | Music medicine (patient-selected)                    | No treatment                      | Valsalva maneuver*  |              | Pain, distress       |
| Aghbolagh 2020 | 120          | 0           | 69.4    | 58       | Parallel    | Peripheral (HD access) | Sounds without linguistic meaning                    | No treatment                      | Visual distraction* |              | Pain                 |
| Art 1994       | 180          | 0           | 9.7     | 56       | Parallel    | Peripheral             | Music medicine (researcher-selected)                 | No treatment                      | EMLA cream*         |              | Pain                 |
| Balan 2009     | 150          | 0           | 8       | 59       | Parallel    | Peripheral             | Music medicine (researcher-selected)                 | Only wearing headphones           | EMLA cream*         |              | Pain, AE             |
| Çelikol 2019   | 200          | 0           | 9.7     | 50       | Parallel    | Peripheral             | Music                                                | No treatment                      | Video*              |              | Distress             |

|                            |     |    |      |    |           |                           |                                                |                                            |                                               |  |                             |
|----------------------------|-----|----|------|----|-----------|---------------------------|------------------------------------------------|--------------------------------------------|-----------------------------------------------|--|-----------------------------|
|                            |     |    |      |    |           |                           | medicine<br>(patient-<br>selected)             |                                            |                                               |  |                             |
| Schaal 2021                | 107 | 21 | 56.6 | 0  | Parallel  | Port catheter             | Music<br>medicine<br>(patient-<br>selected)    | Only wearing<br>headphones                 |                                               |  | Distress                    |
| Jacobson 1999              | 110 | 0  | 53   | 53 | Parallel  | Peripheral                | Music<br>medicine<br>(patient-<br>selected)    | No treatment                               | Intradermal<br>injection of<br>normal saline* |  | Pain, distress,<br>AE       |
| Hsieh 2017                 | 68  | 0  | 8.1  | 53 | Parallel  | Peripheral                | Music<br>medicine<br>(patient-<br>selected)    | No treatment                               |                                               |  | Pain, distress              |
| Karaca 2022                | 60  | 0  | 4.9  | 48 | Parallel  | Peripheral                | Music<br>medicine<br>(patient-<br>selected)    | No treatment                               |                                               |  | Distress                    |
| Ikenoue 2020               | 121 | 3  | 64   | 71 | Crossover | Peripheral<br>(HD access) | Music<br>medicine<br>(researcher-<br>selected) | Sounds<br>without<br>linguistic<br>meaning |                                               |  | Pain, cost,<br>distress, AE |
| Shabandokht-<br>Zarmi 2017 | 114 | 5  | 59   | 53 | Parallel  | Peripheral<br>(HD access) | Music<br>medicine<br>(patient-<br>selected)    | Only wearing<br>headphones                 | No treatment                                  |  | Pain                        |

|                 |     |   |      |    |          |                        |                                      |                                   |                     |  |                    |
|-----------------|-----|---|------|----|----------|------------------------|--------------------------------------|-----------------------------------|---------------------|--|--------------------|
| Hoseini 2019    | 268 | 9 | 8.1  | 49 | Parallel | Peripheral             | Music medicine (researcher-selected) | No treatment                      | Riddle solving*     |  | Pain               |
| Momenabadi 2021 | 90  | 0 | 51   | 54 | Parallel | Peripheral             | Music medicine (patient-selected)    | No treatment                      | Hugo point massage* |  | Pain, cost         |
| Raghibi 2018    | 93  | 4 | 48.5 | 66 | Parallel | Peripheral (HD access) | Music medicine (researcher-selected) | No treatment                      | Arnica ointment*    |  | Pain               |
| Mou 2020        | 300 | 0 | 57.3 | 80 | Parallel | PICC                   | Music medicine (patient-selected)    | No treatment                      |                     |  | Distress           |
| Hartling 2013   | 42  | 0 | 6.3  | 62 | Parallel | Peripheral             | Music therapy                        | No treatment                      |                     |  | Pain, distress     |
| Jacquier 2022   | 75  | 4 | 60.5 | 54 | Parallel | CV catheter            | Music therapy                        | No treatment                      |                     |  | Pain, distress, AE |
| Gerçeker 2019   | 141 | 4 | 9.3* | 54 | Parallel | Peripheral             | Music medicine (researcher-selected) | Sounds without linguistic meaning | No treatment        |  | Pain, distress     |
| Nouira 2020     | 240 | 0 | NR   | NR | Parallel | Peripheral             | Music medicine (researcher-selected) | No treatment                      |                     |  | Pain               |

|                   |     |    |      |    |           |                                      |                                      |                                |                    |                    |                          |
|-------------------|-----|----|------|----|-----------|--------------------------------------|--------------------------------------|--------------------------------|--------------------|--------------------|--------------------------|
| Sahiner 2016      | 120 | 0  | 9.1  | 53 | Parallel  | Peripheral                           | Music medicine (researcher)          | No treatment                   | Distraction cards* | Balloon inflation* | Pain                     |
| Shahabi 2007      | 46  | 0  | 9.1  | 52 | Crossover | Peripheral                           | Music medicine (researcher-selected) | No treatment                   | EMLA cream*        |                    | Pain                     |
| Press 2013        | 94  | 0  | 10.7 | 61 | Parallel  | Peripheral                           | Music medicine (researcher-selected) | No treatment                   |                    |                    | Pain                     |
| Zengin 2013       | 100 | 0  | 49.9 | 52 | Parallel  | Port catheter                        | Music medicine (researcher-selected) | No treatment                   |                    |                    | Pain, distress           |
| Kishida 2019      | 8   | 0  | 66.4 | 63 | Parallel  | Peripheral (HD access)               | Music medicine (researcher-selected) | Sounds with linguistic meaning |                    |                    | Pain, cost, distress, AE |
| Fleckenstein 2022 | 117 | 43 | 60   | 53 | Parallel  | Port catheter or CV catheter or PICC | Music medicine (patient-selected)    | No treatment                   |                    |                    | Distress, AE             |

|              |    |   |      |    |          |            |               |              |                  |  |                |
|--------------|----|---|------|----|----------|------------|---------------|--------------|------------------|--|----------------|
| Alemdar 2023 | 99 | 0 | 15.4 | 83 | Parallel | Peripheral | Music therapy | No treatment | Hand<br>massage* |  | Pain, distress |
|--------------|----|---|------|----|----------|------------|---------------|--------------|------------------|--|----------------|

\*These interventions were not included in the meta-analysis.

Abbreviations: RCT, randomized controlled trial; NR, not reported; HD, haemodialysis; EMLA, emulsion of lidocaine and prilocaine; AE, adverse events; PICC, peripherally inserted central venous catheter; CV, central venous

**Supplemental Table 6. Characteristics, including eligibility criteria, of the 27 studies in this review**

| Publication           | Study duration                   | Setting       | Country   | Inclusion criteria                                                                                                                                                                                                                                                                                                                                                   | Exclusion criteria                                                                                                                                                                                                                                                                                                                                                                                                                                                                               | Funding |
|-----------------------|----------------------------------|---------------|-----------|----------------------------------------------------------------------------------------------------------------------------------------------------------------------------------------------------------------------------------------------------------------------------------------------------------------------------------------------------------------------|--------------------------------------------------------------------------------------------------------------------------------------------------------------------------------------------------------------------------------------------------------------------------------------------------------------------------------------------------------------------------------------------------------------------------------------------------------------------------------------------------|---------|
| <b>Aydin 2017</b>     | July 1st to September 20th, 2015 | Single center | Turkey    | Being aged 7–12 years and requiring blood tests.                                                                                                                                                                                                                                                                                                                     | If they were neuro-developmentally delayed, had verbal difficulties, hearing or visual impairments, used analgesics within the last 6 h, or if they had a history of syncope due to blood sampling and children who could not phlebotomy.                                                                                                                                                                                                                                                        | Unclear |
| <b>Tapar 2017</b>     | April to July 2017               | Single center | Turkey    | Patients with an American Society of Anesthesiologists physical status score of I or II, aged between 18 and 65, and had given written informed consent were included.                                                                                                                                                                                               | Patients with a history of drug addiction, anxiety disorders, hearing problems, chronic consumption of analgesics, or peripheral neuropathy and patients with verbal communication problems were excluded. In addition, patients with failed first-attempt cannulation were excluded.                                                                                                                                                                                                            | Unclear |
| <b>Aghbolagh 2020</b> | July to December 2017            | Single center | Iran      | Age over 60 years, at least two months passed from the installation of AVF, undergoing HD three sessions per week and each session lasting for 4 h, no history of verbal disturbances, no addiction or drug dependence to pain medications, no history of mental health diseases, and ability to pass the abbreviated mental test indicating their cognitive health. | Unwillingness to continue with the study, unsuccessful AVF cannulation at the first try, use of tranquilizers in the last 8 h, failure to attend more than two distraction sessions due to referral to another healthcare center, kidney transplantation and death, the presence of pain in other areas of the body based on the older patient's report, presence of infection and obstruction of fistula based on the nurse's inspection, and the presence of auditory and visual disturbances. | No      |
| <b>Arts 1994</b>      | Not reported                     | Not reported  | Australia | Children aged 4 to 16 years who were to undergo surgery under general anesthesia via intravenous cannulation.                                                                                                                                                                                                                                                        | Children who required preanesthetic medication, who had major physical and mental handicaps and who refused intravenous cannulation.                                                                                                                                                                                                                                                                                                                                                             | Yes     |

|                      |                                  |               |         |                                                                                                                                                                                                                                                |                                                                                                                                                                                                                                                                                                                                                                                                                                                                                                                            |         |
|----------------------|----------------------------------|---------------|---------|------------------------------------------------------------------------------------------------------------------------------------------------------------------------------------------------------------------------------------------------|----------------------------------------------------------------------------------------------------------------------------------------------------------------------------------------------------------------------------------------------------------------------------------------------------------------------------------------------------------------------------------------------------------------------------------------------------------------------------------------------------------------------------|---------|
| <b>Balan 2009</b>    | Over 14 months.                  | Single center | India   | Children aged 5-12 yrs requiring venipuncture for blood collection were enrolled, after obtaining informed consent from parents. In addition, children over 7 years of age were enrolled only if they provided assent for their participation. | Children with history of hypersensitivity to local anesthetics of theamide type or to one or more constituents of EMLA, those with history of congenital or idiopathic methemoglobinemia, glucose-6-phosphatase deficiency or severe hepatic disease were excluded. In addition, children with altered sensorium and those found to be having hearing impairment on clinical examination were excluded from the study. Children whose clinical condition warranted urgent administration of drugs, were also not included. | No      |
| <b>Çelikol 2019</b>  | July to September 2015           | Single center | Turkey  | Between 8 and 12 years of age, literate, no mental problems, able to communicate easily, and willing to participate.                                                                                                                           | Not reported                                                                                                                                                                                                                                                                                                                                                                                                                                                                                                               | No      |
| <b>Schaal 2021</b>   | December 2015 to December 2019   | Single center | Germany | Women had an indication for a planned placement of a port catheter under analgesedation to a degree that did not necessitate respiratory support, and adequate German language comprehension in order to answer the questionnaires.            | Patients requiring general anaesthesia as well as known anxiety disorders or other severe psychiatric illnesses.                                                                                                                                                                                                                                                                                                                                                                                                           | No      |
| <b>Jacobson 1999</b> | Not reported                     | Multi centers | America | 18 years or older, English speaking, capable of participating (vision and hearing intact, no obvious or reported cognitive, neurologic, or motor impairment), and medical orders for peripheral IV therapy.                                    | Not reported                                                                                                                                                                                                                                                                                                                                                                                                                                                                                                               | No      |
| <b>Hsieh 2017</b>    | June to November 2014            | Single center | Taiwan  | Hospitalized school-aged children between 6 and 12 years old.                                                                                                                                                                                  | If they had physical or mental disability; had a hearing or visual impairment; had not previously had an IV placement; or had received more than one IV placement concurrently during the procedure.                                                                                                                                                                                                                                                                                                                       | Unclear |
| <b>Karaca 2022</b>   | July to November 2018            | Single center | Turkey  | Between the ages of 4 and 6 years, conscious, and with the ability to communicate.                                                                                                                                                             | The children had chronic and/or severe illness, mental/psychiatric illness, visual and/or hearing impairment, and inability to communicate verbally.                                                                                                                                                                                                                                                                                                                                                                       | Unclear |
| <b>Ikenoue 2020</b>  | August 27, 2018 to June 26, 2019 | Multi centers | Japan   | Across the five facilities, patients over the age of 20 years who are undergoing outpatient HD three times a week, who have received HD for more than 6 months, and who indicated                                                              | Not willing to participate; having a hearing, writing, or visual impairment; being paralysed; facing a difficulty communicating; having a psychiatric                                                                                                                                                                                                                                                                                                                                                                      | No      |

|                               |                              |               |      |                                                                                                                                                                                                                                                                                                                                                                                                                                               |                                                                                                                                                                                                                        |    |
|-------------------------------|------------------------------|---------------|------|-----------------------------------------------------------------------------------------------------------------------------------------------------------------------------------------------------------------------------------------------------------------------------------------------------------------------------------------------------------------------------------------------------------------------------------------------|------------------------------------------------------------------------------------------------------------------------------------------------------------------------------------------------------------------------|----|
|                               |                              |               |      | experiencing pain during cannulation based on a prior questionnaire.                                                                                                                                                                                                                                                                                                                                                                          | disorder or dementia; undergoing HD therapy fewer than three times per week; and receiving HD through an indwelling catheter.                                                                                          |    |
| <b>Shabandokht-Zarmi 2017</b> | October to December 2016     | Multi centers | Iran | A desire to listen to the music, age of 18 years and older, not diagnosed with neuropathic disorders, no history of depression, treated with HD for at least 3 months, not administered tranquilizers, analgesics and sedatives 3 hours before the study, not recently taken antipsychotic medications and tranquilizers, not being cognitively impaired, no hearing and visual impairments, and not habitually listening to music during HD. | Acute pain in other parts of the body, more than one attempt for fistula puncturing, any changes in the physical status during the study, withdrawal from the study, and death                                         | No |
| <b>Hoseini 2019</b>           | January 2011 to January 2017 | Single center | Iran | Age 7-9 years, clear consciousness, first venipuncture, no hearing and vision problems, able to communicate verbally, no mental retardation or cerebral palsy, no medication for diagnosed psychiatric disorder, no use of analgesics (oral and topical) and hypnotics within 48 hours, no painful illness before venipuncture.                                                                                                               | Inability to obtain parental consent to participate, re-venipuncture in the same patient, epilepsy or other life-threatening emergency situations                                                                      | No |
| <b>Momenabadi 2021</b>        | Not reported                 | Single center | Iran | Children aged 3-6 years old who were admitted to pediatric section of Amiral-Momenin Hospital in Semnan and needed IV line insertion were selected by available sampling method. The conditions to enter the study were: not acute illness, first experience of IV insertion in hospital, absence of parents in the health and treatment group, not using sedative medications for 8 hours before IV insertion.                               | Children who needed IV insertion for second time.                                                                                                                                                                      | No |
| <b>Raghibi 2018</b>           | 2017                         | Two centers   | Iran | Above 18 years, consciousness, ability to communicate, need for HD at least twice a week, not receiving any analgesics or drugs six hours before HD, absence of severe pain in other organs, and no skin problems or numbness at the site of access to the veins of diabetic patients.                                                                                                                                                        | Lack of cooperation, kidney transplantation and termination of HD treatment, development of wound at the site of fistula at any stage of the disease, misplacement of the fistula needle at the first time, and death. | No |

|                      |                                     |               |         |                                                                                                                                                                                                                                                                 |                                                                                                                                                                                                                                                                             |         |
|----------------------|-------------------------------------|---------------|---------|-----------------------------------------------------------------------------------------------------------------------------------------------------------------------------------------------------------------------------------------------------------------|-----------------------------------------------------------------------------------------------------------------------------------------------------------------------------------------------------------------------------------------------------------------------------|---------|
| <b>Mou 2020</b>      | May to December 2015                | Single center | China   | Having pathological proof of lung cancer, being hospitalized for chemotherapy and willing to accept PICC catheter, age above 18 years, with life expectancy more than three months, being able to understand, read, and Chinese.                                | Not the first time to receive PICC, diagnosed with mental illness, with symptoms of pain with hearing impairment does not like to listen to music and being in a critical condition.                                                                                        | No      |
| <b>Hartling 2013</b> | January 1, 2009, to March 31, 2010  | Single center | Canada  | Children attending the pediatric emergency department were eligible if they were aged 3 to 11 years, undergoing an IV placement, conscious, and had sufficient knowledge of English to understand and follow instructions and complete the age appropriate pain | If they had hearing impairments, developmental disabilities, or sensory impairment to pain. Children were also excluded at the discretion of the attending staff (eg, child in critical condition; requiring urgent IV placement; or in an altered level of consciousness). | No      |
| <b>Jacquier 2021</b> | from February 2018 to February 2019 | Single center | France  | Adults $\geq 18$ years old who were hospitalized in the intensive care unit, and for whom insertion of a central venous catheter or a dialysis catheter was planned. Patients had to be able to hear and understand explanations and consent.                   | Severe hearing impairment, allergy to local anesthetic, pregnancy, previous participation, refusal to participate, and, according to the French law, absence of social security coverage number or patient under guardianship.                                              | No      |
| <b>Gerceker 2019</b> | September to November 2017          | Single center | Turkey  | Aged 5–12-year-old, underwent blood draw, had no chronic or genetic diseases, had no visual problem or eyeglasses. The informed consent was received from children and parents.                                                                                 | Patients who refused to participate, had chronic or genetic diseases, and had visual problem                                                                                                                                                                                | Unclear |
| <b>Nouira 2020</b>   | Not reported                        | Single center | Tunisia | Patients consulting the emergency department and needed venous sampling, peripheral venous catheter or arterial catheter.                                                                                                                                       | not reported                                                                                                                                                                                                                                                                | Unclear |
| <b>Sahiner 2016</b>  | not reported                        | Single center | Turkey  | Children aged 6–12 years who requested blood tests.                                                                                                                                                                                                             | not reported                                                                                                                                                                                                                                                                | No      |
| <b>Shahabi 2007</b>  | not reported                        | Single center | Iran    | Children from 6 to 12 years old with Thalassemia                                                                                                                                                                                                                | not reported                                                                                                                                                                                                                                                                | unclear |
| <b>Press 2013</b>    | not reported                        | Single center | Israel  | Age 6–16, conscious, Hebrew speaking, with no hearing problem, undergoing venipuncture                                                                                                                                                                          | not reported                                                                                                                                                                                                                                                                | unclear |

|                          |                              |               |         |                                                                                                                                                                                                                                                                                                                                                                                                                                                                 |                                                                                                                                                                                                                                                                                                                                                                                                           |    |
|--------------------------|------------------------------|---------------|---------|-----------------------------------------------------------------------------------------------------------------------------------------------------------------------------------------------------------------------------------------------------------------------------------------------------------------------------------------------------------------------------------------------------------------------------------------------------------------|-----------------------------------------------------------------------------------------------------------------------------------------------------------------------------------------------------------------------------------------------------------------------------------------------------------------------------------------------------------------------------------------------------------|----|
| <b>Zengin 2013</b>       | 1 March to 30 September 2012 | Single center | Turkey  | Newly diagnosed oncology patients with ages ranging from 18 to 75 years, were enrolled in the study. Port catheters are placed to use chemotherapy and nutrition for the oncological patients in our medical center. Patients were included if they were undergoing port catheter placement for the first time; were aged at least 16 years; were Turkish-speaking and able to read at fifth-grade level; and were mentally competent to sign the consent form. | Auditory problems, hormonal dysfunction, steroid, anxiolytic and sedative use, cocaine abuse, an established diagnosis of severe anxiety disorder, active psychosis or dementia, and uncontrolled hypertension.                                                                                                                                                                                           | No |
| <b>Kishida 2019</b>      | October to November 2016     | Multi centers | Japan   | Patients who are undergoing HD, and aged 20 and over.<br>Patients who feel pain during AVF cannulation (visual analog scale >30 mm in clinical practice)                                                                                                                                                                                                                                                                                                        | Unable to obtain consent, hearing impairment, unable to write a self-assessment form, visual impairment, paralysis, communication difficulties, mental illness, cognition disease., patients who were not on HD more than 6 months, or patients with outpatient dialysis less than 3 times a week or more than 4 times a week                                                                             | No |
| <b>Fleckenstein 2022</b> | November 2019 to June 2020   | Not reported  | Germany | Age of majority, hemodynamic stability, German speaking and ability to consent participation in the study.                                                                                                                                                                                                                                                                                                                                                      | Patients with hearing difficulties or dementia, emergency procedures and procedures under general anaesthesia were excluded. Moreover, specific exclusion criteria for port procedure comprised haemorrhagic diathesis, thrombosis of jugular and subclavian veins, bilateral or acute infectious disease (e.g. sepsis or local implantation site infection) with increased risk of early port infection. | No |
| <b>Alemdar 2023</b>      | June 2019 to December 2020   | Single center | Turkey  | Being an adolescent aged 12–18 years, not being intubated and not receiving mechanical ventilator support, parents and child able to speak Turkish, and agreeing to participate in the research.                                                                                                                                                                                                                                                                | Cognitive dysfunction in the adolescent, surgical interventions being performed, receiving sedative or muscle-relaxant drugs, and hearing difficulty.                                                                                                                                                                                                                                                     | No |

Abbreviations: AVF, arteriovenous fistula; HD, hemodialysis; EMLA, emulsion of lidocaine and prilocaine; IV, intravenous ; PICC, peripherally inserted central venous catheter

**Supplemental Table 7. Summary of acoustic stimulations assigned to each classification**

| Classification of stimulation        | Study                  | Acoustic stimulation                                                                                                  | Sound source and auditory device           |
|--------------------------------------|------------------------|-----------------------------------------------------------------------------------------------------------------------|--------------------------------------------|
| Music medicine (patient-selected)    | Jacobson 1999          | Selected from 11 CDs including different type of music. (e.g., jazz, country music)                                   | Portable CD player with headphones         |
|                                      | Hsieh 2017             | Self-selected music video                                                                                             | Music video (auditory devise: NR)*         |
|                                      | Shabandokht-Zarmi 2017 | Selected from pieces of familiar folklore/traditional/soothing music                                                  | MP4 player with headphones                 |
|                                      | Momenabadi 2021        | His/her favorite song                                                                                                 | NR                                         |
|                                      | Aydin 2017             | Selected from 20 Turkish pop fast songs                                                                               | Tablet pc (probably with built-in speaker) |
|                                      | Taper 2017             | Their selected music                                                                                                  | MP3 player with speaker                    |
|                                      | Schaal 2021            | Selected from 4 music lists with different types of music (jazz, classical, lounge, meditation music) without lyrics. | MP3 player with headphones                 |
|                                      | Karaca 2022            | Selected music (chosen 1 of 2 toys)                                                                                   | Toys with speaker*                         |
|                                      | Mou 2020               | Selected from 3 music libraries (classical, light, folk music)                                                        | Headphones (built-in sound source)         |
|                                      | Celikol 2019           | Selected from 3 songs                                                                                                 | Earphones (Sound source: NR)               |
|                                      | Fleckenstein 2022      | Selected their desired style of music or artist                                                                       | Smart speaker                              |
| Music medicine (researcher-selected) | Raghibi 2018           | Nature alongside music                                                                                                | Laptop PC with headphones*                 |
|                                      | Arts 1994              | Appealing and distracting music (the same for all children-contemporary, up-beat music)                               | Earphones (Sound source: NR)               |
|                                      | Gerceker 2019          | Slow music                                                                                                            | Virtual reality headset*                   |
|                                      | Nouira 2020            | Music                                                                                                                 | Headphones (Sound source: NR)              |
|                                      | Sahiner 2016           | Music of cartoon                                                                                                      | NR                                         |
|                                      | Shahabi 2007           | Music                                                                                                                 | NR                                         |
|                                      | Press 2013             | Song                                                                                                                  | Headphones (Sound source: NR)              |

|                                   |                |                                                                                                        |                                                       |
|-----------------------------------|----------------|--------------------------------------------------------------------------------------------------------|-------------------------------------------------------|
|                                   | Zengin 2013    | Turkish classical music ('Acemis, iran' in Turkish)                                                    | Probably with speaker (Sound source NR)               |
|                                   | Hoseini 2019   | Music                                                                                                  | Music video (auditory devise: NR)*                    |
|                                   | Balan 2009     | Indian instrumental classical music (Hindustani classical music – instrumental – raaga-) 'Todi'        | Walkman with earphones                                |
|                                   | Ikenoue 2020   | Mozart's "Sonata for two pianos in D major, K.448,"                                                    | Tablet PC with headphones                             |
|                                   | Kishida 2019   | Mozart music                                                                                           | Tablet PC with earphones                              |
| Music therapy                     | Hartling 2013  | Music chosen by a music therapist                                                                      | iPod with speaker                                     |
|                                   | Jacquier 2021  | Music program composed by musicians, scientists, and music therapists                                  | (Probably sound source: tablet PC)<br>With headphones |
|                                   | Alemdar 2023   | Music selected by a classical music therapist                                                          | Music pillow                                          |
| Sounds with linguistic meaning    | Kishida 2019   | Radio news                                                                                             | Tablet PC with earphones                              |
| Sounds without linguistic meaning | Ikenoue 2020   | White noise                                                                                            | Tablet PC with headphones                             |
|                                   | Aghbolagh 2020 | Sounds from nature such as a flowing river, waterfall, walking through the forest, sea, and bird songs | MP3 player with headphones                            |
|                                   | Gerceker 2019  | Sound hearing in riding roller coaster                                                                 | Virtual reality headset*                              |

\* Indirectness was downgraded by one rank when assessing confidence because visual stimuli were involved. Abbreviations: CD, compact disc; PC, personal computer; NR, not reported.

Supplemental Table 8. Intervention and outcome details for each study

| Publication    | Interventions in detail                                                                                                                                                                                                                                                                                                                                                          |                                                                                                                                                                                                                  |                                                                                                                                                                                                                                                                                                                                                                                               |                                                                                                                                               | Outcomes of interest                                              |
|----------------|----------------------------------------------------------------------------------------------------------------------------------------------------------------------------------------------------------------------------------------------------------------------------------------------------------------------------------------------------------------------------------|------------------------------------------------------------------------------------------------------------------------------------------------------------------------------------------------------------------|-----------------------------------------------------------------------------------------------------------------------------------------------------------------------------------------------------------------------------------------------------------------------------------------------------------------------------------------------------------------------------------------------|-----------------------------------------------------------------------------------------------------------------------------------------------|-------------------------------------------------------------------|
|                | Treatment A                                                                                                                                                                                                                                                                                                                                                                      | Treatment B                                                                                                                                                                                                      | Treatment C                                                                                                                                                                                                                                                                                                                                                                                   | Treatment D                                                                                                                                   |                                                                   |
| Aydin 2017     | <b>Music medicine (patient) + distraction card</b><br>During phlebotomy process, the children were asked to choose one of song stored in a tablet pc and music is playing, and the researcher asked the children about what they could see on the cards.                                                                                                                         | <b>Music medicine (patient)</b><br>During phlebotomy process, the children were asked to choose one of 20 Turkish pop fast songs stored in a tablet pc, which was then played throughout the phlebotomy process. | <b>Distraction card</b><br>The distraction cards consisted of 5 × 8 cm visual cards with various pictures and shapes. The children were given the opportunity to examine the cards, and then the researcher asked the children about what they could see on the cards. Distraction with the cards began immediately prior to phlebotomy and continued until the procedure had been completed. | <b>No treatment</b><br>The children in this group were allowed to keep their family nearby. The routine blood taking procedure was conducted. | <b>Pain:</b> Wong-Baker FACES pain rating scale                   |
| Tapar 2017     | <b>Music medicine (patient)</b><br>Patients were asked about their music preferences before peripheral venous cannulation and listened to their selected music during the procedure (music was played for five minutes using speakers linked to an MP3 player.                                                                                                                   | <b>No treatment</b><br>No action was performed during peripheral venous cannulation.                                                                                                                             | <b>Valsalva maneuver</b><br>Patients were instructed to perform Valsalva maneuver just before peripheral venous cannulation: patients were asked to inhale deeply and then hold their breath after application of the tourniquet. cannulation was performed during this time. Patients were asked to resume breathing after cannulation.                                                      |                                                                                                                                               | <b>Pain:</b> VAS pain score<br><b>Distress:</b> VAS anxiety score |
| Aghbolagh 2020 | <b>Sounds without linguistic meaning</b><br>Listening distraction was started five minutes prior to hemodialysis, and the older patient listened to the selected sounds from nature such as a flowing river, waterfall, walking through the forest, sea, and bird songs using headphones and an MP3-player considering a 25–50 dB sound volume calibrated by an audiologist. The | <b>No treatment</b><br>Received routine care during three consecutive hemodialysis sessions.                                                                                                                     | <b>Visual distraction</b><br>Initially five min before starting hemodialysis, natural and eye-catching images consisting of the images of sea, birds, and animals were broadcasted through a video display device on a laptop monitor in a manner that was easy for the older patient to watch while they were lying on the bed.                                                              |                                                                                                                                               | <b>Pain:</b> NRS                                                  |

|            |                                                                                                                                                                                                         |                                                                                                                                                                                                                                                                                                                                                     |                                                                                                                                                                                                  |  |                                  |
|------------|---------------------------------------------------------------------------------------------------------------------------------------------------------------------------------------------------------|-----------------------------------------------------------------------------------------------------------------------------------------------------------------------------------------------------------------------------------------------------------------------------------------------------------------------------------------------------|--------------------------------------------------------------------------------------------------------------------------------------------------------------------------------------------------|--|----------------------------------|
|            | distraction technique was continued for three consecutive hemodialysis sessions.                                                                                                                        |                                                                                                                                                                                                                                                                                                                                                     |                                                                                                                                                                                                  |  |                                  |
| Arts 1994  | <b>Music medicine (researcher)</b><br>Appealing and distracting music (the same for all children-contemporary, up-beat music) via earphones. The music was begun just before the cannulation procedure. | <b>No treatment</b><br>The placebo cream which was indistinguishable from EMLA in appearance, smell and cosmetic characteristics, were applied according to the instructions (a thick layer under an occlusive permeable dressing) at least 1 hour before intravenous cannulation.                                                                  | <b>EMLA cream</b><br>The EMLA creams were applied according to the EMLA cream instructions (a thick layer under an occlusive permeable dressing) at least 1 hour before intravenous cannulation. |  | <b>Pain:</b> Visual analogue toy |
| Balan 2009 | <b>Music medicine (researcher)</b><br>Indian instrumental classical music (Type of music: Hindustani classical music – instrumental – raaga-) ‘Todi’: was played with the walkman.                      | <b>Only wearing headphones</b><br>RB applied placebo cream (2.5g) consisting of 100% petroleum jelly to the local body part with an occlusive dressing for 45 min. Earphones attached to a ‘Walkman’ was applied to the child’s ears for 15 min before the procedure, through the procedure and for 5 min thereafter. However, no music was played. | <b>EMLA cream</b><br>EMLA cream (lidocaine 2.5% and prilocaine 2.5%) was applied. (placebo cream was not used for local application.)                                                            |  | <b>Pain:</b> VAS<br><b>AE</b>    |

|                      |                                                                                                                                                                                                                                                                                                                                                                                                                                                                                                                                                                                             |                                                                                                                                                                                                                                                                       |                                                                                                                                                                                                                      |  |                                                                            |
|----------------------|---------------------------------------------------------------------------------------------------------------------------------------------------------------------------------------------------------------------------------------------------------------------------------------------------------------------------------------------------------------------------------------------------------------------------------------------------------------------------------------------------------------------------------------------------------------------------------------------|-----------------------------------------------------------------------------------------------------------------------------------------------------------------------------------------------------------------------------------------------------------------------|----------------------------------------------------------------------------------------------------------------------------------------------------------------------------------------------------------------------|--|----------------------------------------------------------------------------|
| <b>Çelikol 2019</b>  | <b>Music medicine (patient)</b><br><p>The children were made to listen to one of the three songs intended to attract the children's attention through earphones, and the blood draw procedure was conducted when the children were busy listening. The children were made to listen to music or watch a video at least for 5 minutes before and during the procedure until the end of procedure.</p>                                                                                                                                                                                        | <b>No treatment</b><br><p>Parents were allowed to accompany their children, but no pain-reducing intervention of any kind was applied in the blood testing room of the pediatric department. This was the usual procedure in the blood testing room.</p>              | <b>Video</b><br><p>The children were made to watch to a video they preferred among three different cartoons through 3D glasses, and the blood draw procedure was conducted when the children were busy watching.</p> |  | <b>Distress:</b> Fear of Medical Procedures Scale                          |
| <b>Schaal 2021</b>   | <b>Music medicine (patient)</b><br><p>Four music lists with different types of music (jazz music, classical music, lounge music, meditation music) were provided by the researchers for the intervention. Each patient selected one type of music genre she wanted to listen to during surgery. Music was carefully selected following recommendations described elsewhere. To prevent confounding effects caused by emotion-evoking texts, only instrumental music without lyrics was used. All participants wore noise-cancelling supra-aural headphones, connected to an mp3-player.</p> | <b>Only wearing headphones</b><br><p>All participants wore noise-cancelling supra-aural headphones, connected to an mp3-player. In order to blind the medical staff, also the members of the control group wore headphones that were connected to the mp3-player.</p> |                                                                                                                                                                                                                      |  | <b>Distress:</b> VAS                                                       |
| <b>Jacobson 1999</b> | <b>Music medicine (patient)</b><br><p>Subject listened to music according to the technique of using music for distraction outlined by Mc Caffery. The subject selected one of 11 CDs that were representative of different musical styles. The type of music the CDs represented (eg, jazz, country) was explained to the</p>                                                                                                                                                                                                                                                               | <b>No treatment</b><br><p>Subjects had the IV inserted by the usual method, without additional interventions.</p>                                                                                                                                                     | <b>Intradermal injection of normal saline</b><br><p>An intradermal injection of normal saline solution</p>                                                                                                           |  | <b>Pain:</b> VAS<br><b>Distress:</b> VAS<br><b>AE:</b> Cannulation failure |

|            |                                                                                                                                                                                                                                                                                                                                                                                                                                                                                                                                                                                                                                                                                                                                                                                                                                                                                                                                                                                                                                                                             |                                                                                                                                                                                                                                                                                     |  |  |                                                     |
|------------|-----------------------------------------------------------------------------------------------------------------------------------------------------------------------------------------------------------------------------------------------------------------------------------------------------------------------------------------------------------------------------------------------------------------------------------------------------------------------------------------------------------------------------------------------------------------------------------------------------------------------------------------------------------------------------------------------------------------------------------------------------------------------------------------------------------------------------------------------------------------------------------------------------------------------------------------------------------------------------------------------------------------------------------------------------------------------------|-------------------------------------------------------------------------------------------------------------------------------------------------------------------------------------------------------------------------------------------------------------------------------------|--|--|-----------------------------------------------------|
|            | <p>subject if needed. The subject chose a particular track from the CD, or played the beginning track, on a Craig portable compact disc player, with Sony Dynamic Stereo Headphones. The music treatment began after the subject signed the consent form and just before the investigator started the IV insertion. Subjects adjusted the volume to their liking, and listened to the music during the entire IV catheter insertion procedure.</p>                                                                                                                                                                                                                                                                                                                                                                                                                                                                                                                                                                                                                          |                                                                                                                                                                                                                                                                                     |  |  |                                                     |
| Hsieh 2017 | <p><b>Music medicine (patient)</b></p> <p>Children received the cognitive intervention before the placement procedure. The pre-placement intervention measures included providing the proposed educational photo book on IV placement (i.e., Detective Conan) and explaining the contents of each page in the photo book within 10-15 minutes, thereby guiding the participants in comprehending the aims and procedure of IV placements.</p> <p>Allowing the children to watch or listen to their favorite music videos was an intervention measure used to divert their attention during the IV placement procedure, thereby mitigating their pain and fear. Before the IV placements were administered, the researchers discussed with the participants regarding their favorite songs, inviting their primary care providers to participate in the discussion. According to the children's selections, their preferred music videos were played from YouTube during the intervention. Immediately before the procedure, the children started to listen to the music</p> | <p><b>No treatment</b></p> <p>Children received routine care; specifically, before the IV placements were administered, the participants were verbally informed regarding the placement aims and procedure, and, after the placement, they were educated about care procedures.</p> |  |  | <p><b>Pain:</b> NRS</p> <p><b>Distress:</b> NRS</p> |

|             |                                                                                                                                                                                                                                                                                                                                                                                                                                                                                                                                                                                                                        |                                                                                                                                                                                                                                                                                                                                                                                                                                  |  |  |                                                               |
|-------------|------------------------------------------------------------------------------------------------------------------------------------------------------------------------------------------------------------------------------------------------------------------------------------------------------------------------------------------------------------------------------------------------------------------------------------------------------------------------------------------------------------------------------------------------------------------------------------------------------------------------|----------------------------------------------------------------------------------------------------------------------------------------------------------------------------------------------------------------------------------------------------------------------------------------------------------------------------------------------------------------------------------------------------------------------------------|--|--|---------------------------------------------------------------|
|             | videos that they had selected (total time: 5–10 minutes); the volume was controlled within a range of 40–60 dB.                                                                                                                                                                                                                                                                                                                                                                                                                                                                                                        |                                                                                                                                                                                                                                                                                                                                                                                                                                  |  |  |                                                               |
| Karaca 2022 | <p><b>Music medicine (patient)</b></p> <p>Each child in the intervention group was given a choice to play with 1 of 2 toys with bee and rabbit figures. These toys appeal to all age groups, although they are attractive for the 4 to 6 age group. These toys dance to the music playing during the movement. They distract children with the music and lights flashing around them during the dance. The toys were introduced to the children by the researcher 5 to 10 minutes before the procedure. Children were asked to choose one, and they were allowed to play with the toy of their choice. The toy was</p> | <p><b>No treatment</b></p> <p>Standard care was maintained for the children in the control group. In many hospitals in Turkey, no pharmacological or non pharmacological methods are routinely used to reduce pain, fear, or anxiety during IV puncture procedure. Parents are allowed to stay with the child during the procedure. In this study, all parents stayed with their children during the IV insertion procedure.</p> |  |  | <p><b>Distress:</b></p> <p>Children’s State Anxiety Scale</p> |

|                        |                                                                                                                                                                                                                                                                                                                                                                                                                                                                                                                                                                                                   |                                                                                                                                                                                               |                                                                                                                                                  |  |                                                                                         |
|------------------------|---------------------------------------------------------------------------------------------------------------------------------------------------------------------------------------------------------------------------------------------------------------------------------------------------------------------------------------------------------------------------------------------------------------------------------------------------------------------------------------------------------------------------------------------------------------------------------------------------|-----------------------------------------------------------------------------------------------------------------------------------------------------------------------------------------------|--------------------------------------------------------------------------------------------------------------------------------------------------|--|-----------------------------------------------------------------------------------------|
|                        | <p>placed on a hard surface in front of the bed or on the bed.</p> <p>After the child was asked to choose whether to perform the procedure lying down or sitting, the toy was placed in the child’s line of sight to let them concentrate on the toy. The IV insertion procedure was carried out at least 5 to 10 minutes after the child concentrated on the toy.</p> <p>During the procedure, the child was allowed to take the toy and look at the lights and movements.</p>                                                                                                                   |                                                                                                                                                                                               |                                                                                                                                                  |  |                                                                                         |
| Ikenoue 2020           | <p><b>Music medicine (researcher)</b></p> <p>During the music period, the participants started listening to music through the headphones eight minutes before the start of the cannulation procedure and underwent a puncture while listening to music. The music used was Mozart’s “Sonata for two pianos in D major, K.448,” which is known to have the “Mozart effect” as validated by multiple music therapy studies.</p>                                                                                                                                                                     | <p><b>Sounds without linguistic meaning</b></p> <p>During the white noise period, participants similarly listened to white noise</p>                                                          |                                                                                                                                                  |  | <p><b>Pain:</b> VAS</p> <p><b>Cost</b></p> <p><b>Distress:</b> VAS</p> <p><b>AE</b></p> |
| Shabandokht-Zarmi 2017 | <p><b>Music medicine (patient)</b></p> <p>A few pieces of familiar Persian folklore/traditional/soothing music were initially selected by the experimenter on the basis of patients’ social and cultural background, and were then offered to the music group during a session before the intervention. The music group listened to their self-selected and preferred music using an MP4 player through an headphone 6 minutes before needle insertion into a AVF until the end of venipuncture procedure. Each participant was asked to concentrate on the music and ignore everything else.</p> | <p><b>Only wearing headphones</b></p> <p>Subjects wore a headphone alone without listening to music 6 minutes before needle insertion into a AVF until the end of venipuncture procedure.</p> | <p><b>No treatment</b></p> <p>The control group did not receive any intervention from the research team during needle insertion into an AVF.</p> |  | <p><b>Pain:</b> VAS</p>                                                                 |

|                        |                                                                                                                                                                                                                                                                                                                                                                                                                                                                                                                                                                                                              |                                                                                                                                                                                                                                                                                                                                                                        |                                                                                                                                                                                                                                                                                                                                                                                 |  |                                                      |
|------------------------|--------------------------------------------------------------------------------------------------------------------------------------------------------------------------------------------------------------------------------------------------------------------------------------------------------------------------------------------------------------------------------------------------------------------------------------------------------------------------------------------------------------------------------------------------------------------------------------------------------------|------------------------------------------------------------------------------------------------------------------------------------------------------------------------------------------------------------------------------------------------------------------------------------------------------------------------------------------------------------------------|---------------------------------------------------------------------------------------------------------------------------------------------------------------------------------------------------------------------------------------------------------------------------------------------------------------------------------------------------------------------------------|--|------------------------------------------------------|
| <b>Hoseini 2019</b>    | <b>Music medicine (researcher)</b><br>Subjects listened to video music played using the same tablet computer from one minute before to one minute after the IV puncture procedure.                                                                                                                                                                                                                                                                                                                                                                                                                           | <b>No treatment</b><br>usual care                                                                                                                                                                                                                                                                                                                                      | <b>Riddle solving</b><br>Video puzzle solving group                                                                                                                                                                                                                                                                                                                             |  | <b>Pain:</b> The Wong-Baker Scale                    |
| <b>Momenabadi 2021</b> | <b>Music medicine (patient)</b><br>Before playing the music, the child's parents were asked about favorite song in the area of approved songs and his/ her favorite song was played within the determined time limit.                                                                                                                                                                                                                                                                                                                                                                                        | <b>No treatment</b><br>Subjects did not receive any intervention and only the usual procedure of IV insertion was carried out.                                                                                                                                                                                                                                         | <b>Hugo point massage</b><br>Subjects received a Hugo point massage before IV insertion.                                                                                                                                                                                                                                                                                        |  | <b>Pain:</b> Ocher's pain score<br><b>Cost</b>       |
| <b>Raghibi 2018</b>    | <b>Music medicine (researcher)</b><br>In order to distract the patients during insertion of AVF needle, images related to nature alongside music were presented using a laptop and headphone for 30 minutes. Specifically, the patients lied in a semi-seated position, the laptop was placed on the table ahead of the patients, and its monitor was opened towards them. Then, a headphone was provided to the patients, and music and images were presented to them. The music and images were presented for half an hour. Ten minutes after beginning the music, fistula needle insertion was performed. | <b>No treatment</b><br>Vaseline cream were employed by the researcher for 60 minutes before AVF insertion by as large as around 5 cm2 on the needle insertion site. A bandage was then placed on it. Next, Vaseline cream was cleared off the skin surface, the needle placement site was disinfected with Betadine, and then arterial needle insertion was performed. | <b>Arnica ointment</b><br>Arnica ointment were employed by the researcher for 60 minutes before fistula insertion by as large as around 5 cm2 on the needle insertion site. A bandage was then placed on it. Next, Arnica ointment was cleared off the skin surface, the needle placement site was disinfected with Betadine, and then arterial needle insertion was performed. |  | <b>Pain:</b> VAS                                     |
| <b>Mou 2020</b>        | <b>Music medicine (patient)</b><br>In addition to routine nursing care, music listening was performed during PICC placement procedure (generally 30min) and delivered by the researchers using wireless headphones with memory card slot. The music was selected by reviewing the literature about music therapy. A slow rhythm, low tone, soothing melody with 60-80                                                                                                                                                                                                                                        | <b>No treatment</b><br>Routine nursing care                                                                                                                                                                                                                                                                                                                            |                                                                                                                                                                                                                                                                                                                                                                                 |  | <b>Distress:</b> Numeric visual analog anxiety scale |

|                      |                                                                                                                                                                                                                                                                                                                                                                                                                                                                                                                                                                                                                                                                                 |                                                                                                                                                                                                                                                 |  |  |                                                                |
|----------------------|---------------------------------------------------------------------------------------------------------------------------------------------------------------------------------------------------------------------------------------------------------------------------------------------------------------------------------------------------------------------------------------------------------------------------------------------------------------------------------------------------------------------------------------------------------------------------------------------------------------------------------------------------------------------------------|-------------------------------------------------------------------------------------------------------------------------------------------------------------------------------------------------------------------------------------------------|--|--|----------------------------------------------------------------|
|                      | beats/min or less was chosen. Researcher set up three music libraries, including classical music, light music, and folk music; these belong to melodious music with pleasant rhythms, which has shown to yield a calming effect and a sense of well-being, and each music library consisted of 10 pieces of music. The patients selected their preferred music, a controlled volume (45-60dB) and listened through a wireless headphone.                                                                                                                                                                                                                                        |                                                                                                                                                                                                                                                 |  |  |                                                                |
| <b>Hartling 2013</b> | <b>Music therapy</b><br>Music was chosen by a music therapist and administered through an iPod dock. All participants listened to the same recordings via ambient speakers in the following order: The Planets Op. 32 Jupiter, Storms in Africa, Disco Beat, and Sunny Days. The volume of the music was set in advance and was the same for each child. Children listened to the music until the procedure was completed; in some cases, children did not listen to all 4 selections. Both groups received standard care. For both groups, there were no restrictions around whether the parent could be present or how they interacted with their child during the procedure. | <b>No treatment</b><br>Standard care (including topical anesthetics and techniques that staff would normally use to comfort the child such as talking to the child, explaining what is being done, and saying comforting and supportive things) |  |  | <b>Pain:</b> Faces Pain Scale–Revised<br><b>Distress:</b> STAI |
| <b>Jacquier 2021</b> | <b>Music therapy</b><br>Patients listened to music via headphones. The musical source we used was Music Care, a software commonly used in the intensive care unit and other medical fields.                                                                                                                                                                                                                                                                                                                                                                                                                                                                                     | <b>No treatment</b><br>The routine catheter insertion procedure                                                                                                                                                                                 |  |  | <b>Pain:</b> VAS<br><b>Distress:</b> VAS<br><b>AE</b>          |

|                      |                                                                                                                                                                                                                                                                                                                                                                       |                                                                                                                                                             |                                                                                                                                                                                                                                                                                                                                                                                                                                                                                                                                                                         |                                                                                                                                                                                                                                                                 |                                                                                |
|----------------------|-----------------------------------------------------------------------------------------------------------------------------------------------------------------------------------------------------------------------------------------------------------------------------------------------------------------------------------------------------------------------|-------------------------------------------------------------------------------------------------------------------------------------------------------------|-------------------------------------------------------------------------------------------------------------------------------------------------------------------------------------------------------------------------------------------------------------------------------------------------------------------------------------------------------------------------------------------------------------------------------------------------------------------------------------------------------------------------------------------------------------------------|-----------------------------------------------------------------------------------------------------------------------------------------------------------------------------------------------------------------------------------------------------------------|--------------------------------------------------------------------------------|
| <b>Gerceker 2019</b> | <b>Music medicine (researcher)</b><br>By wearing the virtual reality headsets, individuals can take an underwater tour with 12 different marine animals with slow music.                                                                                                                                                                                              | <b>Sounds without linguistic meaning</b><br>By wearing the virtual reality headsets, individuals feel as if they are getting on and riding a rollercoaster. | <b>No treatment</b><br>No additional procedure                                                                                                                                                                                                                                                                                                                                                                                                                                                                                                                          |                                                                                                                                                                                                                                                                 | <b>Pain:</b> VAS<br><b>Distress:</b> The Child Fear Scale                      |
| <b>Nouira 2020</b>   | <b>Music medicine (researcher)</b><br>Ten minutes listening music by headphones                                                                                                                                                                                                                                                                                       | <b>No treatment</b><br>The same care without listening music.                                                                                               |                                                                                                                                                                                                                                                                                                                                                                                                                                                                                                                                                                         |                                                                                                                                                                                                                                                                 | <b>Pain:</b> VAS<br><b>Distress</b> (not reported)<br><b>AE</b> (not reported) |
| <b>Sahiner 2016</b>  | <b>Music medicine (researcher)</b><br>The music of cartoons that are watched mostly by children aged 6–12 years. Fifteen cartoons in total were used in the room where blood was taken, and the kids were asked to which cartoon the music belonged. It was skipped to another song when the kids recognized the music. This process continued while blood was taken. | <b>No treatment</b><br>Routine blood taking procedure                                                                                                       | <b>Distraction cards</b><br>The distraction cards consisted of visual cards of 5 x 8 cm <sup>2</sup> , covered with various pictures and shapes. In this method, the children carefully examined the cards, then the researcher asked some questions about those cards to be answered by the children, such as ‘How many ladybugs are there in the picture?’ and ‘How many apes are there in the picture?’ or ‘Can you see the comet?’ The distraction procedure via distraction cards began just before the phlebotomy and continued until the procedure was complete. | <b>Balloon inflation</b><br>The kids were given whatever color balloons they wanted. They were asked to inflate the balloon before process and kept on inflating after the process was concluded, at which time the kids were given the balloons they inflated. | <b>Pain:</b> Wong-Baker FACES pain rating scale                                |
| <b>Shahabi 2007</b>  | <b>Music medicine (researcher)</b><br>Music from playing music with appropriate children's lyrics                                                                                                                                                                                                                                                                     | <b>No treatment</b><br>Usual care                                                                                                                           | <b>EMLA cream</b><br>EMLA cream                                                                                                                                                                                                                                                                                                                                                                                                                                                                                                                                         |                                                                                                                                                                                                                                                                 | <b>Pain:</b> Wong and Baker's self-report criteria                             |
| <b>Press 2013</b>    | <b>Music medicine (researcher)</b><br>The experimental condition included uncertainty reduction together with active distraction. (1) Uncertainty reduction: one of the two attending nurses                                                                                                                                                                          | <b>No treatment</b><br>Usual care                                                                                                                           |                                                                                                                                                                                                                                                                                                                                                                                                                                                                                                                                                                         |                                                                                                                                                                                                                                                                 | <b>Pain:</b> VAS                                                               |

|                          |                                                                                                                                                                                                                                                                                                                                                                                                                                                                                                                                                                                                                                                                                                                                                                                 |                                                                                                |  |  |                                                |
|--------------------------|---------------------------------------------------------------------------------------------------------------------------------------------------------------------------------------------------------------------------------------------------------------------------------------------------------------------------------------------------------------------------------------------------------------------------------------------------------------------------------------------------------------------------------------------------------------------------------------------------------------------------------------------------------------------------------------------------------------------------------------------------------------------------------|------------------------------------------------------------------------------------------------|--|--|------------------------------------------------|
|                          | participating in the study told the patient the following message: "Today you and I will do everything to make you feel good during the test. I'll show you can help yourself feel good". (2) Active distraction: the child was showed a pair of head-phones, was asked what they were, was offered to touch them, and instructed to put them on his/her ears. The child was then told: "I'll put a song on for you, listen to it until the end, and wait for a question about it". This was intended to produce active listening and more cognitive demands during the distraction. After hearing the song (and completing the venipuncture) the nurse asked the child a question about the song's content (the same question for all children in the experimental condition). |                                                                                                |  |  |                                                |
| <b>Zengin 2013</b>       | <b>Music medicine (researcher)</b><br>All port catheter placement procedures were performed in the surgical intervention room of the emergency department, in which a music system had previously been established. Subjects listened to Turkish classical music ('Acemisiran' in Turkish) from the time when they were taken into the surgical intervention room until the procedures had been completed.                                                                                                                                                                                                                                                                                                                                                                      | <b>No treatment</b><br>Usual care                                                              |  |  | <b>Pain:</b> VAS<br><b>Distress:</b> STAI      |
| <b>Kishida 2019</b>      | <b>Music medicine (researcher)</b><br>Wearing headphone and listening to Mozart music                                                                                                                                                                                                                                                                                                                                                                                                                                                                                                                                                                                                                                                                                           | <b>Sounds with linguistic meaning</b><br>Wearing headphone and listening to Radio News program |  |  | <b>Pain:</b> VAS<br><b>Distress:</b> VAS<br>AE |
| <b>Fleckenstein 2022</b> | <b>Music medicine (patient-selected)</b><br>Patients were allowed to choose their desired style of music or artist. The music was played in the angio suite                                                                                                                                                                                                                                                                                                                                                                                                                                                                                                                                                                                                                     | <b>No treatment</b><br>No detailed description                                                 |  |  | <b>Distress:</b> STAI<br>AE                    |

|              |                                                                                                                                                                                                                                                                                                                                                                                                                                                                                                                                                                                                                                                                                                                                        |                                                                                                                                                                         |                                                                                                                                                                                                                                                                                                                                                                                                                                                                                                                                                                                                                                                                                                                                                                                                                                                                                                                                                                                                                                                                        |  |                                                                                                                       |
|--------------|----------------------------------------------------------------------------------------------------------------------------------------------------------------------------------------------------------------------------------------------------------------------------------------------------------------------------------------------------------------------------------------------------------------------------------------------------------------------------------------------------------------------------------------------------------------------------------------------------------------------------------------------------------------------------------------------------------------------------------------|-------------------------------------------------------------------------------------------------------------------------------------------------------------------------|------------------------------------------------------------------------------------------------------------------------------------------------------------------------------------------------------------------------------------------------------------------------------------------------------------------------------------------------------------------------------------------------------------------------------------------------------------------------------------------------------------------------------------------------------------------------------------------------------------------------------------------------------------------------------------------------------------------------------------------------------------------------------------------------------------------------------------------------------------------------------------------------------------------------------------------------------------------------------------------------------------------------------------------------------------------------|--|-----------------------------------------------------------------------------------------------------------------------|
|              | on a wireless stereo sound system established for that purpose exclusively (smart speaker). Sound volume was set to be around 50 dB.                                                                                                                                                                                                                                                                                                                                                                                                                                                                                                                                                                                                   |                                                                                                                                                                         |                                                                                                                                                                                                                                                                                                                                                                                                                                                                                                                                                                                                                                                                                                                                                                                                                                                                                                                                                                                                                                                                        |  |                                                                                                                       |
| Alemdar 2023 | <p><b>Music therapy</b></p> <p>The music therapy application began 10 min before the painful procedure and continued during and after the procedure for a total of 20 min with a ‘music pillow’(Creatone music pillow). The time, length, and frequency of the intervention were chosen based on the minimal data available. Classical music listened to by the study group in the research was a short piece chosen with nearly 60-beat tempo, without dramatic moments, disturbing chords and mismatched minors, and in a major key selected by a classical music therapist in line with expert opinion and the literature. The piece was slow and had soft movement. Additionally, acalm mental state was present in the piece.</p> | <p><b>No treatment</b></p> <p>Children did not have any non-pharmacological method applied. Adolescents received routine care practiced in the intensive care unit.</p> | <p><b>Hand massage</b></p> <p>the hand massage practice began 10 min before the painful procedure and continued during and after the procedure for a total of 20 min. The researcher was trained in the practice of massage. Massage began with the right hand and continued with the left hand. Classic massage techniques were used for hand massage. The massage began on the back of the hand and after effleurage 5 times for the whole back of the hand with the palm, effleurage was performed on each finger singly from the end joints to the bottom joints. Later palm massage began. For palm mas-sage, the researcher supported the patient's hand with their free hand and performed effleurage for the whole palm to the wrist with their other hand. After effleurage ended, surface friction was applied with the thumb to the finger joints and bottom joints. After friction, petrissage was performed for the tenar and hypotenar muscle groups with the fingers. Later general effleurage was performed for the hand and the massage was ended</p> |  | <p><b>Pain:</b> Wong-Baker FACES Pain Rating Scale</p> <p><b>Distress:</b> Children's Fear Scale</p> <p><b>AE</b></p> |

Abbreviation: VAS, visual analog scale; NRS, numerical rating scale; HD, hemodialysis; AE, adverse events; IV, intravenous; PICC, peripherally inserted central venous catheter; STAI, State-Trait Anxiety Inventory; EMLA, emulsion of lidocaine and prilocaine

Supplemental Table 9. Direct and pooled comparisons and rankings for self-reported pain

|                                         |                             |                                   |                                      |                                      |                             |                             |
|-----------------------------------------|-----------------------------|-----------------------------------|--------------------------------------|--------------------------------------|-----------------------------|-----------------------------|
| 1. Music medicine (researcher-selected) | .                           | -0.09 [-1.79; 1.62]               | -0.33 [-1.07; 0.41]                  | .                                    | <u>-0.61 [-0.97; -0.26]</u> | <u>-3.18 [-4.33; -2.03]</u> |
| 0.02 [-0.71; 0.76]                      | 2. Music therapy            | .                                 | .                                    | .                                    | <u>-0.79 [-1.44; -0.14]</u> | .                           |
| -0.09 [-1.79; 1.62]                     | -0.11 [-1.97; 1.74]         | 3. Sounds with linguistic meaning | .                                    | .                                    | .                           | .                           |
| -0.20 [-0.81; 0.40]                     | -0.23 [-1.12; 0.66]         | -0.12 [-1.92; 1.69]               | 4. Sounds without linguistic meaning | .                                    | <u>-0.81 [-1.58; -0.04]</u> | .                           |
| -0.33 [-0.85; 0.20]                     | -0.35 [-1.12; 0.42]         | -0.24 [-2.02; 1.55]               | -0.12 [-0.85; 0.61]                  | 5. Music medicine (patient-selected) | <u>-0.52 [-0.94; -0.11]</u> | -0.84 [-1.94; 0.26]         |
| <u>-0.76 [-1.10; -0.42]</u>             | <u>-0.79 [-1.44; -0.14]</u> | -0.67 [-2.41; 1.06]               | -0.56 [-1.17; 0.05]                  | <u>-0.44 [-0.84; -0.03]</u>          | 6. No treatment             | 0.18 [-0.91; 1.28]          |
| <u>-1.80 [-2.57; -1.03]</u>             | <u>-1.82 [-2.82; -0.83]</u> | -1.71 [-3.58; 0.16]               | <u>-1.60 [-2.54; -0.65]</u>          | <u>-1.47 [-2.27; -0.68]</u>          | <u>-1.04 [-1.80; -0.28]</u> | 7. Only wearing headphones  |

Effect sizes are presented as standardized mean difference (SMD) and 95% confidence interval. Treatments are ranked from best to worst along the leading diagonal. Estimates from pairwise and network meta-analyses are depicted above and below the leading diagonal, respectively. In the network meta-analysis results, statistically significant differences are highlighted by underlining. The areas bordered by red lines show comparisons between different acoustic stimulations.

Supplemental Table 10. Direct and pooled comparisons and rankings for mental distress

|                                            |                                         |                                      |                     |                                         |                               |                      |
|--------------------------------------------|-----------------------------------------|--------------------------------------|---------------------|-----------------------------------------|-------------------------------|----------------------|
| 1. Music medicine<br>(researcher-selected) | -0.21 [-1.33; 0.91]                     | -0.28 [-2.36; 1.80]                  | .                   | .                                       | .                             | -1.17 [-2.30; -0.04] |
| -0.04 [-1.13; 1.04]                        | 2. Sounds without<br>linguistic meaning | .                                    | .                   | .                                       | .                             | -1.70 [-3.31; -0.09] |
| -0.28 [-2.36; 1.80]                        | -0.23 [-2.58; 2.11]                     | 3. Sounds with<br>linguistic meaning | .                   | .                                       | .                             | .                    |
| -0.67 [-2.12; 0.78]                        | -0.63 [-2.24; 0.99]                     | -0.39 [-2.92; 2.14]                  | 4. Music therapy    | .                                       | .                             | -0.57 [-1.52; 0.37]  |
| -0.70 [-1.95; 0.55]                        | -0.65 [-2.09; 0.78]                     | -0.42 [-2.85; 2.01]                  | -0.03 [-1.15; 1.09] | 5. Music medicine<br>(patient-selected) | -0.20 [-1.80; 1.41]           | -0.54 [-1.15; 0.06]  |
| -0.89 [-2.93; 1.14]                        | -0.85 [-3.00; 1.30]                     | -0.62 [-3.52; 2.29]                  | -0.22 [-2.18; 1.73] | -0.20 [-1.80; 1.41]                     | 6. Only wearing<br>headphones | .                    |
| <u>-1.24 [-2.34; -0.15]</u>                | -1.20 [-2.50; 0.11]                     | -0.96 [-3.31; 1.39]                  | -0.57 [-1.52; 0.37] | -0.54 [-1.15; 0.06]                     | -0.35 [-2.06; 1.36]           | 7. No treatment      |

Effect sizes are presented as standardized mean difference (SMD) and 95% confidence interval. Treatments are ranked from best to worst along the leading diagonal. Estimates from pairwise and network meta-analyses are depicted above and below the leading diagonal, respectively. In the network meta-analysis results, statistically significant differences are highlighted by underlining. The areas bordered by red lines show comparisons between different acoustic stimulations.

**Supplemental Table 11. Individual study results in outcome of adverse events (for all studies) grouped by treatment comparison**

| Study                                                                     | Events | Total | Events | Total | Risk ratio [95%CI] |
|---------------------------------------------------------------------------|--------|-------|--------|-------|--------------------|
| Music medicine (researcher-selected) vs Only wearing headphones           |        |       |        |       |                    |
| Balan 2009                                                                | 0      | 50    | 0      | 50    | Not estimable      |
| Music medicine (researcher-selected) vs Sounds without linguistic meaning |        |       |        |       |                    |
| Ikenoue 2020                                                              | 0      | 117   | 0      | 117   | Not estimable      |
| Music medicine (patient-selected) vs No treatment                         |        |       |        |       |                    |
| Jacobson 1999                                                             | 10     | 36    | 10     | 36    | 1.00 [0.47, 2.11]  |
| Music therapy vs No treatment                                             |        |       |        |       |                    |
| Jacquire 2021                                                             | 3      | 36    | 1      | 35    | 2.92 [0.32, 26.72] |
| Music medicine (researcher-selected) vs Sounds with linguistic meaning    |        |       |        |       |                    |
| Kishida 2019                                                              | 0      | 4     | 0      | 4     | Not estimable      |
| Music medicine (patient-selected) vs No treatment                         |        |       |        |       |                    |
| Fleckenstein 2022                                                         | 0      | 61    | 0      | 55    | Not estimable      |

Supplemental Table 12. Report of confidence in network meta-analysis: self-reported pain.

| Comparison                                      | Number of studies | Within-study bias | Reporting bias | Indirectness | Imprecision    | Heterogeneity | Incoherence    | Confidence rating |
|-------------------------------------------------|-------------------|-------------------|----------------|--------------|----------------|---------------|----------------|-------------------|
| Music medicine patient-selected:No treatment    | 7                 | Major concerns    | Low risk       | No concerns  | No concerns    | No concerns   | Some concerns  | Low               |
| Music medicine researcher-selected:No treatment | 8                 | Major concerns    | Low risk       | No concerns  | No concerns    | Some concerns | Some concerns  | Low               |
| Music therapy:No treatment                      | 3                 | Major concerns    | Low risk       | No concerns  | No concerns    | No concerns   | Some concerns  | Low               |
| No treatment:Only wearing headphones            | 1                 | Major concerns    | Low risk       | No concerns  | No concerns    | No concerns   | Major concerns | Very low          |
| No treatment:Sounds without linguistic meaning  | 1                 | Major concerns    | Low risk       | No concerns  | Some concerns  | No concerns   | No concerns    | Low               |
| No treatment:Sounds with linguistic meaning     | 0                 | No concerns       | Low risk       | No concerns  | Major concerns | No concerns   | Some concerns  | Low               |

Supplemental table 13. Global test based on a random-effects design-by-treatment interaction model

| Outcome                                  | $\chi^2$ statistic            | P value |
|------------------------------------------|-------------------------------|---------|
| Self-reported pain                       | 20.945 (5 degrees of freedom) | 0.001   |
| Self-reported pain (Balan 2009 excluded) | 5.637 (4 degrees of freedom)  | 0.228   |
| Self-reported distress                   | 1.073 (2 degrees of freedom)  | 0.585   |

Supplemental Table 14. Report of confidence in network meta-analysis: self-reported distress

| Comparison                                        | Number of studies | Within-study bias | Reporting bias | Indirectness | Imprecision    | Heterogeneity | Incoherence | Confidence rating |
|---------------------------------------------------|-------------------|-------------------|----------------|--------------|----------------|---------------|-------------|-------------------|
| Music medicine (patient-selected):No treatment    | 7                 | Major concerns    | Low risk       | No concerns  | Some concerns  | No concerns   | No concerns | Low               |
| Music medicine (researcher-selected):No treatment | 2                 | Major concerns    | Low risk       | No concerns  | No concerns    | No concerns   | No concerns | Low               |
| Music therapy:No treatment                        | 3                 | Major concerns    | Low risk       | No concerns  | Some concerns  | No concerns   | No concerns | Low               |
| No treatment:Sounds without linguistic meaning    | 1                 | Major concerns    | Low risk       | No concerns  | Some concerns  | No concerns   | No concerns | Low               |
| No treatment:Only wearing headphones              | 0                 | Major concerns    | Low risk       | No concerns  | Major concerns | No concerns   | No concerns | Very low          |
| No treatment:Sounds with linguistic meaning       | 0                 | No concerns       | Low risk       | No concerns  | Major concerns | No concerns   | No concerns | Low               |

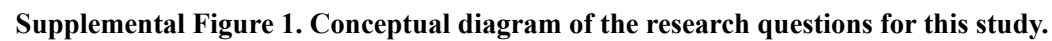

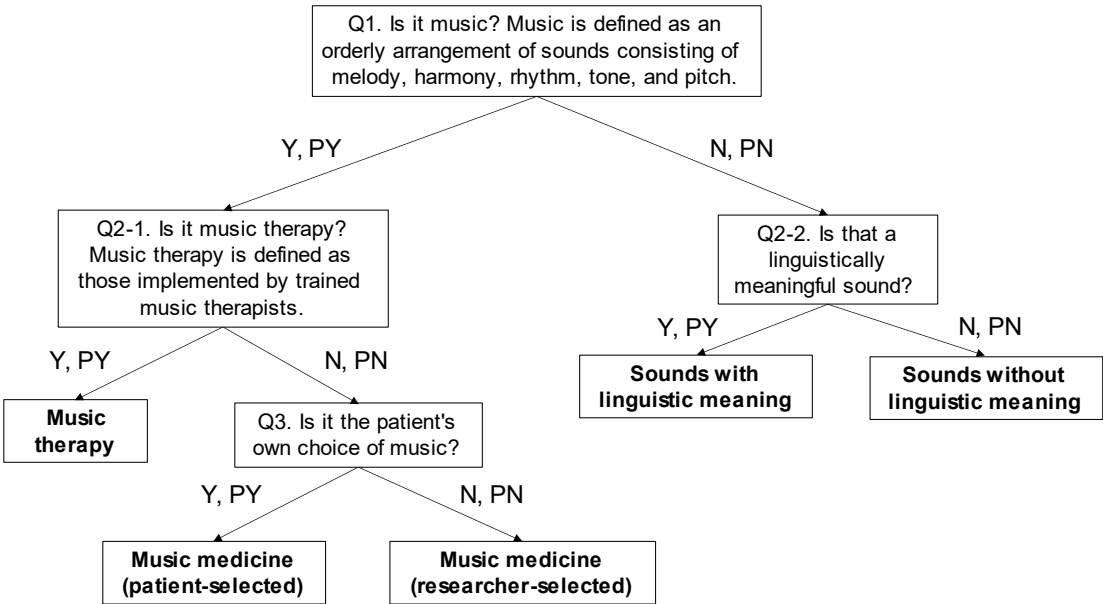

**Supplemental Figure 2. Flow chart to classifying the acoustic stimulations into 5 groups**

Abbreviations: Y, yes; PY, probably yes; N, no; PN, probably no.

| Study ID              | D1 | D2 | D3 | D4 | D5 | Overall |
|-----------------------|----|----|----|----|----|---------|
| Aydin 2017            | +  | +  | +  | -  | !  | -       |
| Tapar 2017            | +  | !  | +  | -  | !  | -       |
| Aghbolagh 2020        | +  | +  | +  | -  | !  | -       |
| Balan 2009            | !  | -  | -  | -  | !  | -       |
| Jacobson 1999         | +  | +  | +  | -  | !  | -       |
| Hsieh 2017            | +  | +  | +  | -  | !  | -       |
| Ikenoue 2021          | +  | +  | +  | +  | +  | +       |
| Shabandokht-Zami 2017 | +  | !  | +  | -  | !  | -       |
| Hoseini 2019          | +  | -  | -  | -  | !  | -       |
| Momenabadi 2021       | +  | -  | -  | -  | !  | -       |
| Raghibi 2018          | +  | +  | +  | -  | !  | -       |
| Hartling 2013         | +  | +  | +  | -  | !  | -       |
| Jacquier 2022         | +  | +  | +  | -  | !  | -       |
| Gerceker 2019         | +  | -  | +  | -  | !  | -       |
| Nouria 2020           | !  | -  | +  | -  | !  | -       |
| Sahiner 2016          | +  | -  | -  | -  | !  | -       |
| Shahabi 2007          | !  | +  | +  | -  | !  | -       |
| Press 2013            | !  | !  | +  | -  | !  | -       |
| Zengin 2013           | +  | +  | +  | -  | !  | -       |
| Kishida 2019          | +  | +  | +  | +  | !  | !       |
| Arts 1994             | +  | +  | +  | -  | !  | -       |
| Alemdar 2023          | !  | +  | +  | -  | !  | -       |

+

Low risk

!

Some concerns

-

High risk

D1

Randomisation process

D2

Deviations from the intended intervention

D3

Missing outcome data

D4

Measurement of the outcome

D5

Selection of the reported result

### Supplemental Figure 3. Risk of bias for outcome of self-reported pain

“D” denotes “Domain”.

| Study ID          | D1 | D2 | D3 | D4 | D5 | Overall |                                               |
|-------------------|----|----|----|----|----|---------|-----------------------------------------------|
| Taper 2017        | +  | !  | +  | -  | !  | -       | +                                             |
| Celikol 2019      | +  | +  | +  | -  | !  | -       | !                                             |
| Schaal 2021       | +  | !  | +  | -  | !  | -       | -                                             |
| Jacobson 1999     | +  | +  | +  | -  | !  | -       |                                               |
| Hsieh 2017        | +  | +  | +  | -  | !  | -       | D1 Randomisation process                      |
| Karaca 2022       | +  | +  | +  | -  | !  | -       | D2 Deviations from the intended interventions |
| Ikenoue 2021      | +  | +  | +  | +  | +  | +       | D3 Missing outcome data                       |
| Mou 2020          | +  | +  | +  | -  | !  | -       | D4 Measurement of the outcome                 |
| Hartling 2013     | +  | +  | +  | -  | !  | -       | D5 Selection of the reported result           |
| Jacquier 2021     | +  | +  | +  | -  | !  | -       |                                               |
| Gerceker 2019     | +  | -  | +  | -  | !  | -       |                                               |
| Zengin 2013       | +  | +  | +  | -  | !  | -       |                                               |
| Kishida 2019      | +  | +  | +  | +  | !  | !       |                                               |
| Fleckenstein 2022 | !  | !  | -  | -  | !  | -       |                                               |
| Alemdar 2023      | !  | +  | +  | -  | !  | -       |                                               |

Supplemental Figure 4. Risk of bias for outcome of self-reported mental distress

“D” denotes “Domain”.

| Study ID          | D1 | D2 | D3 | D4 | D5 | Overall |
|-------------------|----|----|----|----|----|---------|
| Balan 2009        | !  | +  | +  | +  | !  | !       |
| Jacobson 1999     | +  | +  | +  | +  | !  | !       |
| Ikenoue 2021      | +  | +  | +  | +  | +  | +       |
| Jacquire 2021     | +  | +  | +  | +  | !  | !       |
| Kishida 2019      | +  | +  | +  | +  | !  | !       |
| Fleckenstein 2022 | +  | +  | +  | +  | !  | !       |
|                   |    |    |    |    |    |         |
|                   |    |    |    |    |    |         |
|                   |    |    |    |    |    |         |

 Low risk  
 Some concerns  
 High risk

D1 Randomisation process  
D2 Deviations from the intended interventions  
D3 Missing outcome data  
D4 Measurement of the outcome  
D5 Selection of the reported result

**Supplemental Figure 5. Risk of bias for outcome of adverse events**

“D” denotes “Domain”.

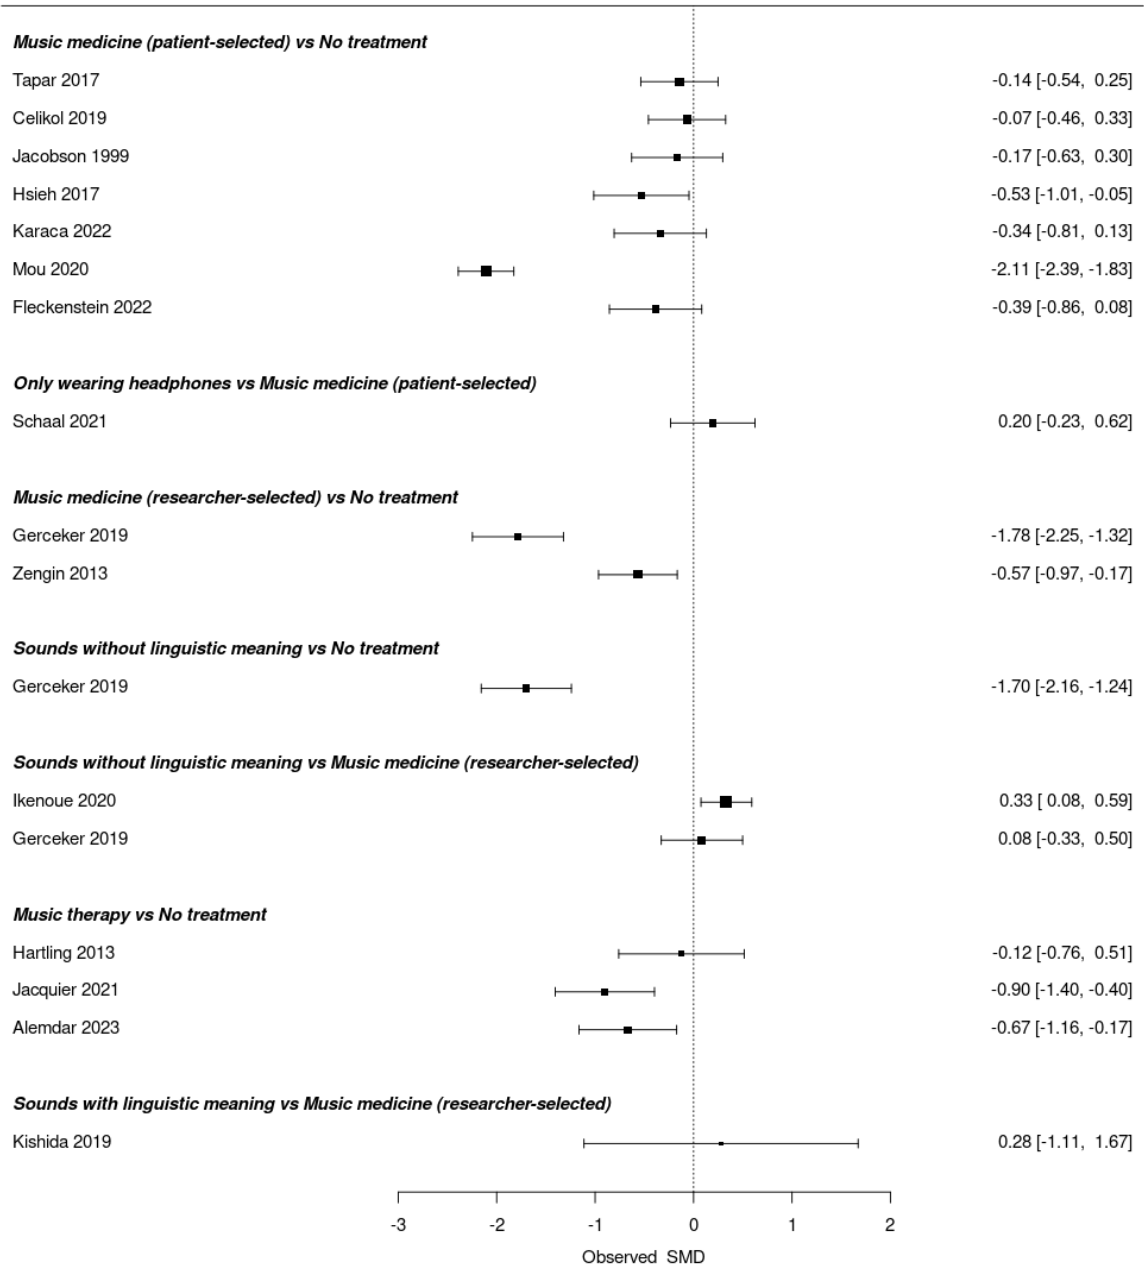

Supplemental Figure 6. Individual study results in outcome of self-reported mental distress (for all studies) grouped by treatment comparison

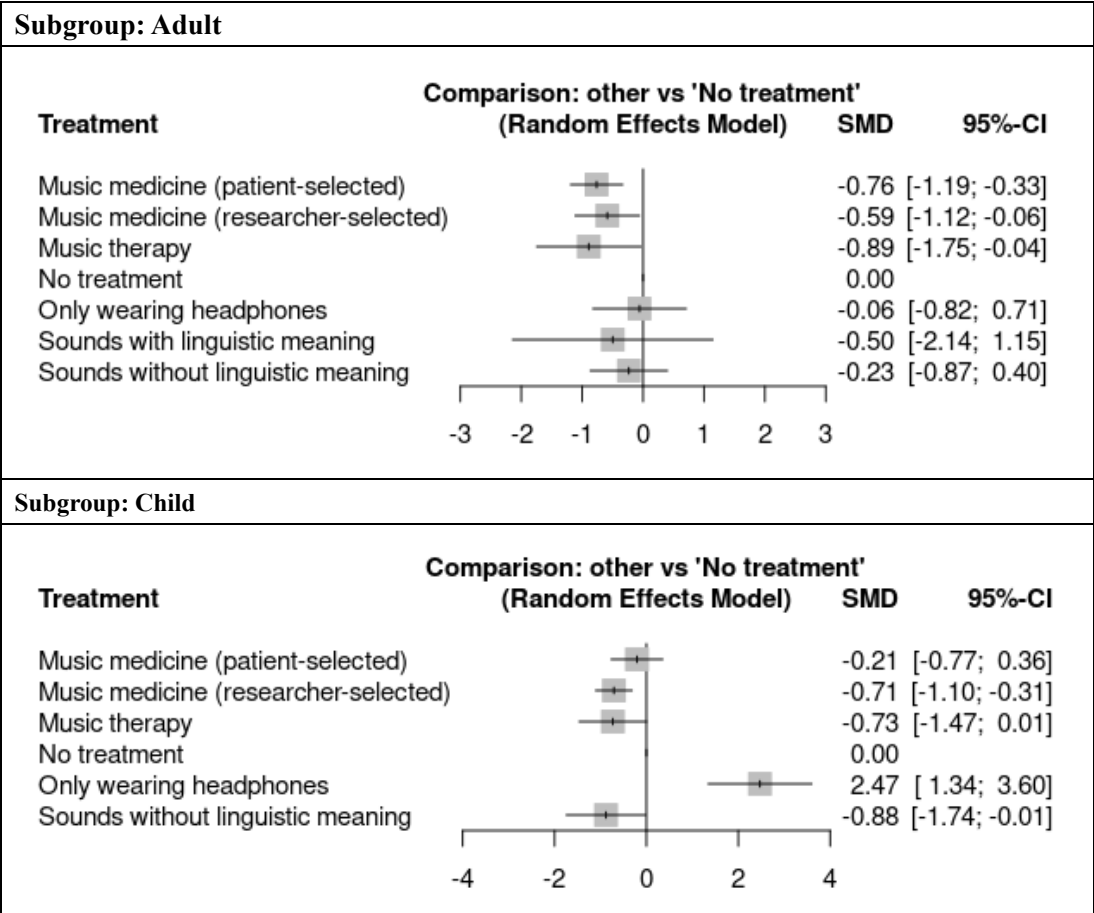

Supplemental Figure 7. Results of subgroup analysis divided into adults or children

There were 10 studies for 896 adults, and 10 studies for 1140 children, defined as < 18 years old. Outcome: self-reported pain.

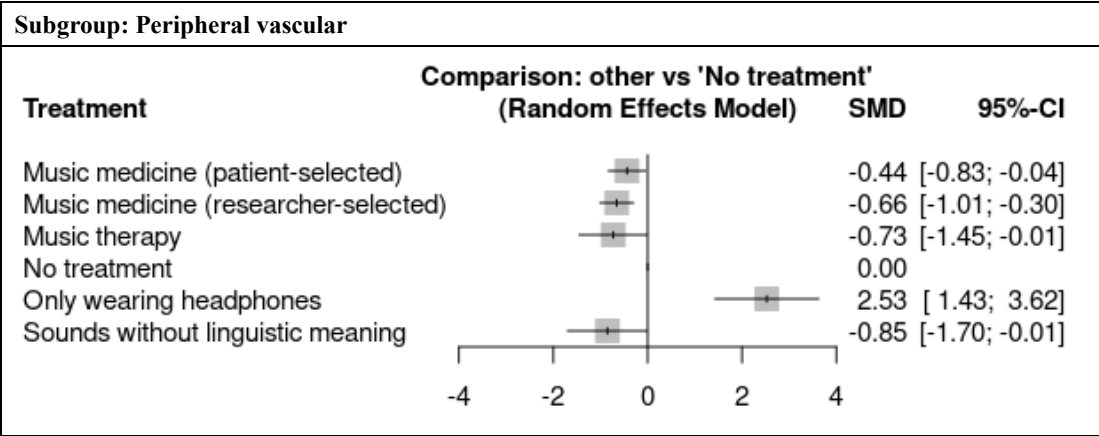

**Supplemental Figure 8. Results of subgroup analysis by type of venipuncture technique**

There were 15 studies for 1,612 peripheral cannulation. There were 5 studies for 489 dialysis access cannulation. Subgroups of dialysis vascular access and indwelling CV catheter were difficult to consider due to small number of studies. Outcome: self-reported pain.

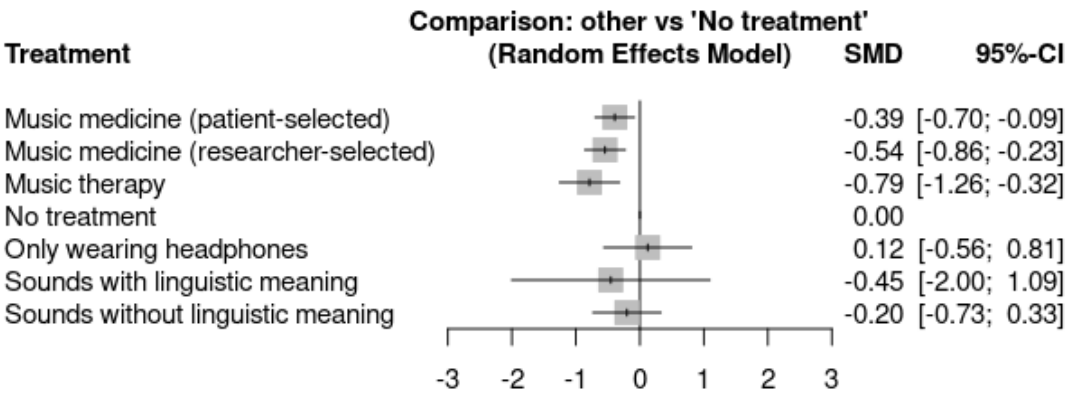

Supplemental Figure 9. Sensitivity analysis excluding high risk of bias study

For D4 in risk of bias evaluation, only studies with SMD > 2 (suspected to have a particularly high risk of bias) were defined as High and calculated; 6 studies (Balan 2009, Hoseini 2019, Momenabadi 2020, Gerceker 2020, Nouira 2020, Sahiner 2016) were excluded.

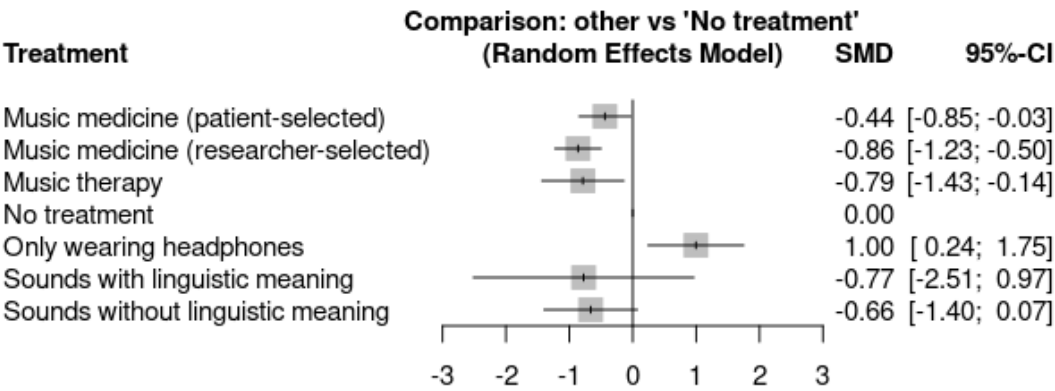

**Supplemental Figure 10. Sensitivity analysis excluding studies that did not report the standard deviation of self-reported pain**

Two studies whose SD were imputed (Aghbolagh 2020 and Arts 1994) were excluded.

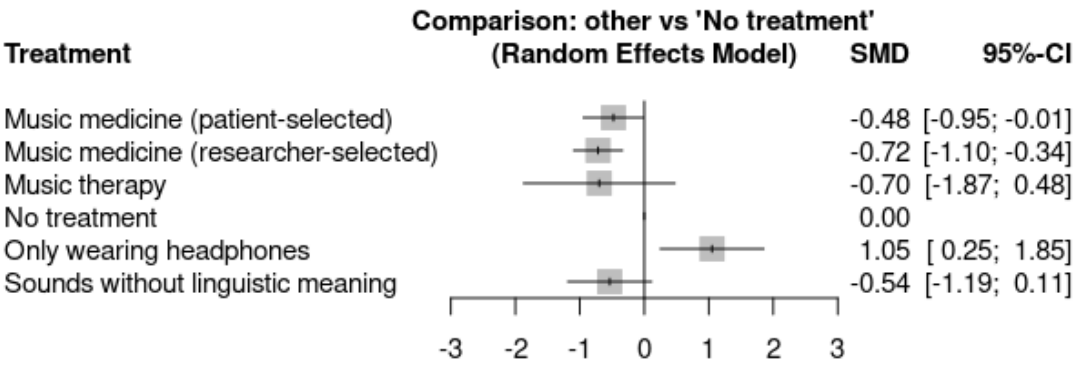

Supplemental Figure 11. Post-hoc sensitivity analysis excluding studies with small number of subjects

Five studies with fewer than 25th percentile patients (Hsieh 2017, Hartling 2013, Jacquier 2022, Shahabi 2007, and Kishida 2019) were excluded.

Supplemental Figure 12. Forest plot for self-reported pain (Balan 2009 excluded)

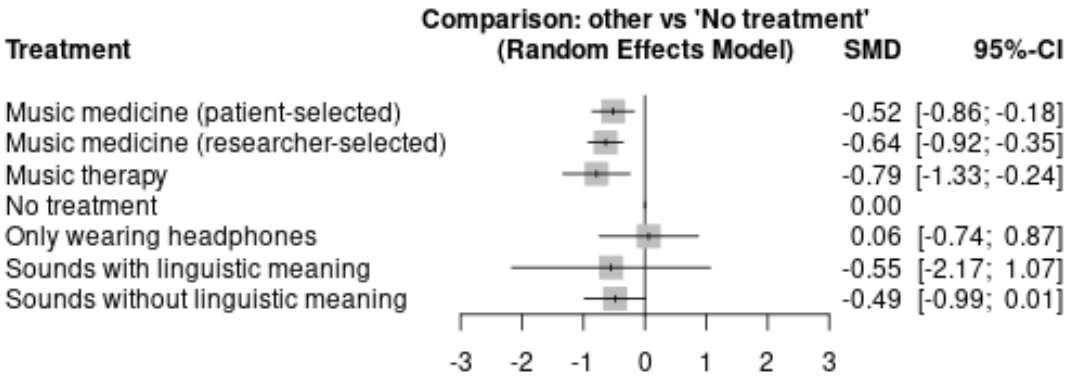

Supplemental Information 1. PRISMA NMA checklist of items to include when reporting a systematic review involving a network meta-analysis

| Section/Topic      | Item # | Checklist Item                                                                                                                                                                                                                                                                                                                                                                                                                                                                                                                                                                                                                                                                                                                                                                          | Reported on Page # |
|--------------------|--------|-----------------------------------------------------------------------------------------------------------------------------------------------------------------------------------------------------------------------------------------------------------------------------------------------------------------------------------------------------------------------------------------------------------------------------------------------------------------------------------------------------------------------------------------------------------------------------------------------------------------------------------------------------------------------------------------------------------------------------------------------------------------------------------------|--------------------|
| TITLE              |        |                                                                                                                                                                                                                                                                                                                                                                                                                                                                                                                                                                                                                                                                                                                                                                                         |                    |
| Title              | 1      | Identify the report as a systematic review <i>incorporating a network meta-analysis (or related form of meta-analysis)</i> .                                                                                                                                                                                                                                                                                                                                                                                                                                                                                                                                                                                                                                                            | Page 1             |
| ABSTRACT           |        |                                                                                                                                                                                                                                                                                                                                                                                                                                                                                                                                                                                                                                                                                                                                                                                         |                    |
| Structured summary | 2      | Provide a structured summary including, as applicable:<br><b>Background:</b> main objectives<br><b>Methods:</b> data sources; study eligibility criteria, participants, and interventions; study appraisal; and <i>synthesis methods, such as network meta-analysis</i> .<br><b>Results:</b> number of studies and participants identified; summary estimates with corresponding confidence/credible intervals; <i>treatment rankings may also be discussed. Authors may choose to summarize pairwise comparisons against a chosen treatment included in their analyses for brevity.</i><br><b>Discussion/Conclusions:</b> limitations; conclusions and implications of findings.<br><b>Other:</b> primary source of funding; systematic review registration number with registry name. | Page 3-4           |
| INTRODUCTION       |        |                                                                                                                                                                                                                                                                                                                                                                                                                                                                                                                                                                                                                                                                                                                                                                                         |                    |
| Rationale          | 3      | Describe the rationale for the review in the context of what is already known, <i>including mention of why a network meta-analysis has been conducted.</i> _                                                                                                                                                                                                                                                                                                                                                                                                                                                                                                                                                                                                                            | Page 6             |
| Objectives         | 4      | Provide an explicit statement of questions being addressed, with reference to participants, interventions, comparisons, outcomes, and study design (PICOS).                                                                                                                                                                                                                                                                                                                                                                                                                                                                                                                                                                                                                             | Page 7             |
| METHODS            |        |                                                                                                                                                                                                                                                                                                                                                                                                                                                                                                                                                                                                                                                                                                                                                                                         |                    |

|                                        |           |                                                                                                                                                                                                                                                                                                                                                                                                                        |            |
|----------------------------------------|-----------|------------------------------------------------------------------------------------------------------------------------------------------------------------------------------------------------------------------------------------------------------------------------------------------------------------------------------------------------------------------------------------------------------------------------|------------|
| Protocol and registration              | 5         | Indicate whether a review protocol exists and if and where it can be accessed (e.g., Web address); and, if available, provide registration information, including registration number.                                                                                                                                                                                                                                 | Page 8     |
| Eligibility criteria                   | 6         | Specify study characteristics (e.g., PICOS, length of follow-up) and report characteristics (e.g., years considered, language, publication status) used as criteria for eligibility, giving rationale. <i>Clearly describe eligible treatments included in the treatment network, and note whether any have been clustered or merged into the same node (with justification).</i>                                      | Page 8-9   |
| Information sources                    | 7         | Describe all information sources (e.g., databases with dates of coverage, contact with study authors to identify additional studies) in the search and date last searched.                                                                                                                                                                                                                                             | Page 9-10  |
| Search                                 | 8         | Present full electronic search strategy for at least one database, including any limits used, such that it could be repeated.                                                                                                                                                                                                                                                                                          | Page 10    |
| Study selection                        | 9         | State the process for selecting studies (i.e., screening, eligibility, included in systematic review, and, if applicable, included in the meta-analysis).                                                                                                                                                                                                                                                              | Page 10    |
| Data collection process                | 10        | Describe method of data extraction from reports (e.g., piloted forms, independently, in duplicate) and any processes for obtaining and confirming data from investigators.                                                                                                                                                                                                                                             | Page 10    |
| Data items                             | 11        | List and define all variables for which data were sought (e.g., PICOS, funding sources) and any assumptions and simplifications made.                                                                                                                                                                                                                                                                                  | Page 9     |
| <b>Geometry of the network</b>         | <b>S1</b> | Describe methods used to explore the geometry of the treatment network under study and potential biases related to it. This should include how the evidence base has been graphically summarized for presentation, and what characteristics were compiled and used to describe the evidence base to readers.                                                                                                           | Page 10-11 |
| Risk of bias within individual studies | 12        | Describe methods used for assessing risk of bias of individual studies (including specification of whether this was done at the study or outcome level), and how this information is to be used in any data synthesis.                                                                                                                                                                                                 | Page 10    |
| Summary measures                       | 13        | State the principal summary measures (e.g., risk ratio, difference in means). <i>Also describe the use of additional summary measures assessed, such as treatment rankings and surface under the cumulative ranking curve (SUCRA) values, as well as modified approaches used to present summary findings from meta-analyses.</i>                                                                                      | Page 10-11 |
| Planned methods of analysis            | 14        | Describe the methods of handling data and combining results of studies for each network meta-analysis. This should include, but not be limited to: <ul style="list-style-type: none"> <li>• <i>Handling of multi-arm trials;</i></li> <li>• <i>Selection of variance structure;</i></li> <li>• <i>Selection of prior distributions in Bayesian analyses; and</i></li> <li>• <i>Assessment of model fit.</i></li> </ul> | Page 10-11 |

|                                   |    |                                                                                                                                                                                                                                                                                                                                                                                                                                              |                                |
|-----------------------------------|----|----------------------------------------------------------------------------------------------------------------------------------------------------------------------------------------------------------------------------------------------------------------------------------------------------------------------------------------------------------------------------------------------------------------------------------------------|--------------------------------|
| Assessment of Inconsistency       | S2 | Describe the statistical methods used to evaluate the agreement of direct and indirect evidence in the treatment network(s) studied. Describe efforts taken to address its presence when found.                                                                                                                                                                                                                                              | Page 11                        |
| Risk of bias across studies       | 15 | Specify any assessment of risk of bias that may affect the cumulative evidence (e.g., publication bias, selective reporting within studies).                                                                                                                                                                                                                                                                                                 | Page 11                        |
| Additional analyses               | 16 | Describe methods of additional analyses if done, indicating which were pre-specified. This may include, but not be limited to, the following: <ul style="list-style-type: none"><li>• Sensitivity or subgroup analyses;</li><li>• Meta-regression analyses;</li><li>• <i>Alternative formulations of the treatment network; and</i></li><li>• <i>Use of alternative prior distributions for Bayesian analyses (if applicable).</i></li></ul> | Page 11                        |
| RESULTS†                          |    |                                                                                                                                                                                                                                                                                                                                                                                                                                              |                                |
| Study selection                   | 17 | Give numbers of studies screened, assessed for eligibility, and included in the review, with reasons for exclusions at each stage, ideally with a flow diagram.                                                                                                                                                                                                                                                                              | Page 13                        |
| Presentation of network structure | S3 | Provide a network graph of the included studies to enable visualization of the geometry of the treatment network.                                                                                                                                                                                                                                                                                                                            | Figure 2                       |
| Summary of network geometry       | S4 | Provide a brief overview of characteristics of the treatment network. This may include commentary on the abundance of trials and randomized patients for the different interventions and pairwise comparisons in the network, gaps of evidence in the treatment network, and potential biases reflected by the network structure.                                                                                                            | Figure 2, Supplemental Table 5 |
| Study characteristics             | 18 | For each study, present characteristics for which data were extracted (e.g., study size, PICOS, follow-up period) and provide the citations.                                                                                                                                                                                                                                                                                                 | Supplemental Table 5           |
| Risk of bias within studies       | 19 | Present data on risk of bias of each study and, if available, any outcome level assessment.                                                                                                                                                                                                                                                                                                                                                  | Page 22                        |

|                                      |           |                                                                                                                                                                                                                                                                                                                                                                                                                                                              |                   |
|--------------------------------------|-----------|--------------------------------------------------------------------------------------------------------------------------------------------------------------------------------------------------------------------------------------------------------------------------------------------------------------------------------------------------------------------------------------------------------------------------------------------------------------|-------------------|
| Results of individual studies        | 20        | For all outcomes considered (benefits or harms), present, for each study: 1) simple summary data for each intervention group, and 2) effect estimates and confidence intervals. <i>Modified approaches may be needed to deal with information from larger networks.</i>                                                                                                                                                                                      | Page 23, Figure 3 |
| Synthesis of results                 | 21        | Present results of each meta-analysis done, including confidence/credible intervals. <i>In larger networks, authors may focus on comparisons versus a particular comparator (e.g. placebo or standard care), with full findings presented in an appendix. League tables and forest plots may be considered to summarize pairwise comparisons.</i> If additional summary measures were explored (such as treatment rankings), these should also be presented. | Page 23-25        |
| <b>Exploration for inconsistency</b> | <b>S5</b> | Describe results from investigations of inconsistency. This may include such information as measures of model fit to compare consistency and inconsistency models, <i>P</i> values from statistical tests, or summary of inconsistency estimates from different parts of the treatment network.                                                                                                                                                              | Page 26-27        |
| Risk of bias across studies          | 22        | Present results of any assessment of risk of bias across studies for the evidence base being studied.                                                                                                                                                                                                                                                                                                                                                        | Page 26-27        |
| Results of additional analyses       | 23        | Give results of additional analyses, if done (e.g., sensitivity or subgroup analyses, meta-regression analyses, <i>alternative network geometries studied, alternative choice of prior distributions for Bayesian analyses</i> , and so forth).                                                                                                                                                                                                              | Page 26           |
| <b>DISCUSSION</b>                    |           |                                                                                                                                                                                                                                                                                                                                                                                                                                                              |                   |
| Summary of evidence                  | 24        | Summarize the main findings, including the strength of evidence for each main outcome; consider their relevance to key groups (e.g., healthcare providers, users, and policy-makers).                                                                                                                                                                                                                                                                        | Page 28-29        |
| Limitations                          | 25        | Discuss limitations at study and outcome level (e.g., risk of bias), and at review level (e.g., incomplete retrieval of identified research, reporting bias). <i>Comment on the validity of the assumptions, such as transitivity and consistency. Comment on any concerns regarding network geometry (e.g., avoidance of certain comparisons).</i>                                                                                                          | Page 29           |
| Conclusions                          | 26        | Provide a general interpretation of the results in the context of other evidence, and implications for future research.                                                                                                                                                                                                                                                                                                                                      | Page 30           |
| <b>FUNDING</b>                       |           |                                                                                                                                                                                                                                                                                                                                                                                                                                                              |                   |
| Funding                              | 27        | Describe sources of funding for the systematic review and other support (e.g., supply of data); role of funders for the systematic review. This should also include information regarding whether funding has been received from manufacturers of treatments in the network and/or whether some of the authors are content experts with professional conflicts of interest that                                                                              | Page 31           |

could affect use of treatments in the network.

PICOS = population, intervention, comparators, outcomes, study design.

\* Text in italics indicates wording specific to reporting of network meta-analyses that has been added to guidance from the PRISMA statement.

† Authors may wish to plan for use of appendices to present all relevant information in full detail for items in this section.

## Supplemental Information 2. Analytical treatment of the study by Aydin et al. and

### basis for the evaluation of confidence

#### ● Analytical treatment of the study by Aydin et al.

Aydin study included four interventions below:

1. music medicine (patient-selected) + distraction card group
2. music medicine (patient-selected) group
3. distraction card group
4. no treatment group

In order to extract the effect of music medicine (patient-selected), The study was divided into below 2 pairs in the analysis:

1. music medicine (patient-selected) group vs No treatment group (Aydin 2017[a])
2. music medicine (patient-selected) + distraction card group vs distraction group (Aydin 2017[b])

#### ● Basis for the evaluation of confidence

##### Outcome: Self-reported pain

- ✓ Within-study bias: The within-study bias of each comparison was evaluated based on the mean score of the results of the overall bias of the ROB for each study, with score 1 for low risk, score 2 for moderate, and score 3 for high risk. For “No treatment vs Sounds with linguistic meaning”, only Kishida 2019 is involved. Although the results of the ROB evaluation of that study are some concerns, the reason is a non-significant reason that the statistical protocols are not publicly available. Therefore. we rated it as Low concerns.
- ✓ For the reporting bias, funnel plots were difficult to evaluate due to the small number of studies (less than 10). However, when the studies included in this review were evaluated individually, reporting bias was considered low risk for all comparisons because many of them assessed outcomes predetermined in the protocols and because all statistical analysis methods were simple and there was no doubt that multiple analyses were performed.
- ✓ For indirectness, the intervention was downgraded one level if it involved visual stimuli such as video as well as acoustic stimulation. However, the proportion was small, and it was considered low risk.
- ✓ For imprecision, we defined clinically important size of effect: 0.8. The Cochrane guidebook was used as reference to establish the value.
- ✓ Heterogeneity was considered as some concerns in the comparison of music medicine

(researcher-selected) vs no treatment.

- ✓ For incoherence, no treatment vs only wearing headphones was rated as very low based on point estimate of the effect size of direct and indirect comparisons.
- ✓ For the comparison of no treatment vs only wearing headphones, we rated its confidence rating as very low because there were two major concerns. For the other comparisons, its confidence rating was set to low since there was a major concern. None of the items rated as some concerns were considered to be significant in the confidence rating evaluation.

### **Outcome: Self-reported distress**

- ✓ Within-study bias: The within-study bias of each comparison was evaluated based on the mean score of the results of the overall bias of the ROB for each study, with score 1 for low, score 2 for some concerns, and score 3 for high. For “No treatment vs Sounds with linguistic meaning”, only Kishida 2019 is involved. Although the results of the ROB evaluation of that study are some concerns, the reason is a non-significant reason that the statistical protocols are not publicly available. Therefore, we rated it as low concerns.
- ✓ For the reporting bias, funnel plots were difficult to evaluate due to the small number of studies (less than 10). However, when the studies included in this review were evaluated individually, reporting bias was considered low risk for all comparisons because many of them assessed outcomes predetermined in the protocols and because all analysis methods were simple and there was no doubt that multiple analyses were performed.
- ✓ For indirectness, the intervention was downgraded one level if it involved visual stimuli such as video as well as acoustic stimulation. However, the proportion was small, and it was considered low risk.
- ✓ For imprecision, we defined clinically important size of effect: 0.8. The Cochrane guidebook was used as reference to establish the value.
- ✓ Heterogeneity was determined to be of no significant concern because the studies included in each comparison had the same positive or negative direction of effect sizes.
- ✓ For incoherence, there was no significant difference between the results of direct and indirect comparisons.
- ✓ For the comparison of no treatment vs only wearing headphones, we rated its confidence rating as very low because there were two major concerns. For the other comparisons, its confidence rating was set to low since there was a major concern. None of the items rated as some concerns were considered to be significant in the confidence rating evaluation.
